# Supplementary material
Source: MDPI journal article supplement (https://www.mdpi.com/2227-7099/11/5/130)
Supplement: s1 [file economies-2295324-supplementary.pdf › economies-2295324-supplementary.pdf]

Supplementary material Nr. 1.

**Table S1.** IC variable summary statistics.

|       | Full       | Pre-pandemic | Pandemic   |
|-------|------------|--------------|------------|
| count | 260        | 150          | 80         |
| mean  | 501153.85  | 225566.67    | 1107262.50 |
| std   | 756423.48  | 14653.68     | 1156119.26 |
| min   | 188000.00  | 203000.00    | 207000.00  |
| max   | 6149000.00 | 298000.00    | 6149000.00 |

Supplementary material Nr. 2.

**Table S2.** Summary statistics of keywords for the pre-pandemic timeframe.

|                             | count | mean     | std      | min | max |
|-----------------------------|-------|----------|----------|-----|-----|
| Fortnite Battle Royale      | 150   | 33,18    | 25,90382 | 0   | 100 |
| Withdrawal From Friends     | 150   | 16,28    | 19,10519 | 0   | 89  |
| Hallucinations              | 150   | 77,23333 | 8,654763 | 50  | 98  |
| Wedding Dress               | 150   | 16,18667 | 8,986483 | 10  | 100 |
| Payday Loans                | 150   | 73,62    | 12,52202 | 41  | 100 |
| Credit Score                | 150   | 61,47333 | 6,915304 | 47  | 77  |
| Social Work                 | 150   | 79,74667 | 11,55215 | 45  | 100 |
| Child Protective Services   | 150   | 70,54    | 7,838667 | 49  | 100 |
| Gardening Services          | 150   | 34,18667 | 15,47303 | 4   | 92  |
| Theatre                     | 150   | 69,64    | 8,663183 | 52  | 100 |
| Shivering                   | 150   | 49,03333 | 12,11545 | 33  | 100 |
| Cinnamon buns               | 150   | 22,68    | 8,8396   | 10  | 75  |
| West Elm Furniture          | 150   | 53,99333 | 9,358983 | 33  | 87  |
| Job Opportunities           | 150   | 79,95333 | 10,00693 | 46  | 100 |
| Cheap Apartments for rent   | 150   | 72,19333 | 8,278456 | 49  | 100 |
| Gardener                    | 150   | 62,05333 | 9,308859 | 46  | 84  |
| Chronic Pain                | 150   | 86,29333 | 6,546218 | 69  | 100 |
| Ziprecruiter                | 150   | 69,72667 | 12,95314 | 38  | 100 |
| Job Offer                   | 150   | 75,95333 | 10,94117 | 31  | 92  |
| Pop Yachts                  | 150   | 28       | 11,6227  | 7   | 65  |
| Rolls Royce                 | 150   | 58,64    | 8,293508 | 46  | 100 |
| Sports Car For Sale         | 150   | 52,46667 | 9,803209 | 32  | 75  |
| House Cleaning Services     | 150   | 45,37333 | 6,927764 | 28  | 68  |
| OnlyFans                    | 150   | 2,486667 | 2,39052  | 1   | 10  |
| Bovada Sports               | 150   | 14,79333 | 9,153645 | 5   | 48  |
| Suicide Hotline             | 150   | 27,67333 | 7,790458 | 20  | 100 |
| Insomnia                    | 150   | 69,17333 | 6,069781 | 52  | 82  |
| How to reduce stress        | 150   | 59,64667 | 13,36033 | 30  | 92  |
| Stress                      | 150   | 79,38    | 11,89533 | 44  | 97  |
| Employment Agency           | 150   | 69,68667 | 9,176229 | 43  | 100 |
| How Much Is Plastic Surgery | 150   | 42,91333 | 12,29554 | 13  | 78  |
| Prostitution                | 150   | 23,05333 | 7,801898 | 17  | 100 |
| Cinema                      | 150   | 50,3     | 10,72646 | 33  | 100 |
| Apex Legends                | 150   | 4,753333 | 12,41288 | 0   | 100 |
| Cold                        | 150   | 43,56667 | 10,31934 | 32  | 92  |
| How to be happy             | 150   | 63,88667 | 6,92097  | 48  | 100 |
| Binance                     | 150   | 2,826667 | 10,66182 | 0   | 100 |
| Chanel Bags                 | 150   | 49,60667 | 6,7156   | 38  | 83  |
| Rent The Runway             | 150   | 70,87333 | 11,88327 | 44  | 100 |
| Prozac                      | 150   | 74,36667 | 4,608741 | 61  | 100 |
| Wedding Planner             | 150   | 51,31333 | 10,62423 | 37  | 100 |
| Ps4                         | 150   | 24,68    | 9,107354 | 17  | 100 |
| Ferarri                     | 150   | 53,13333 | 10,0038  | 32  | 100 |
| Plastic Surgery Near Me     | 150   | 30,14667 | 10,275   | 12  | 55  |
| Plastic Surgery Cost        | 150   | 55,49333 | 9,067788 | 27  | 79  |
| Define Emotional Abuse      | 150   | 33,71333 | 21,80922 | 0   | 100 |
| How To Earn Money           | 150   | 67,43333 | 6,929575 | 50  | 87  |

|                            |     |          |          |    |     |
|----------------------------|-----|----------|----------|----|-----|
| Yachts For Sale            | 150 | 52,03333 | 12,15527 | 32 | 86  |
| Pancakes                   | 150 | 46,32    | 6,050481 | 38 | 78  |
| Prada Bags                 | 150 | 40,55333 | 7,240394 | 25 | 63  |
| Buspirone                  | 150 | 59,80667 | 8,086526 | 42 | 78  |
| Sleepless                  | 150 | 17,52    | 11,774   | 8  | 74  |
| Ballet                     | 150 | 55,63333 | 10,16932 | 39 | 100 |
| Panic Attack               | 150 | 68,05333 | 6,740429 | 55 | 94  |
| Job Vacancies              | 150 | 43,23333 | 10,46593 | 21 | 70  |
| Nail Spa                   | 150 | 63,6     | 11,59669 | 42 | 86  |
| Tiny House For Sale        | 150 | 52,89333 | 10,51311 | 29 | 85  |
| Dior                       | 150 | 18,61333 | 5,110572 | 13 | 40  |
| Career Builder             | 150 | 38,13333 | 20,60646 | 8  | 100 |
| Best Sugar Daddy Websites  | 150 | 37,69333 | 22,88693 | 0  | 94  |
| Auto Insurance             | 150 | 74,99333 | 7,26257  | 57 | 100 |
| Job Interview              | 150 | 79,75333 | 12,70308 | 28 | 100 |
| Heartstone                 | 150 | 44,88    | 13,56116 | 21 | 100 |
| Private Jet For Sale       | 150 | 38,08667 | 12,19745 | 16 | 100 |
| Drug addiction             | 150 | 63,82667 | 10,29155 | 43 | 100 |
| Hydroxyzine                | 150 | 55,32    | 6,893553 | 43 | 70  |
| Celexa                     | 150 | 77,59333 | 7,53791  | 56 | 100 |
| Self Esteem                | 150 | 72,15333 | 11,38275 | 38 | 93  |
| Fatigue                    | 150 | 78,58667 | 5,720781 | 62 | 88  |
| PornHub                    | 150 | 76,88    | 9,004786 | 59 | 100 |
| CheapOair                  | 150 | 66,44667 | 6,503006 | 54 | 84  |
| Nervous                    | 150 | 75,13333 | 16,2793  | 35 | 95  |
| Alprazolam                 | 150 | 63,47333 | 5,33407  | 51 | 100 |
| Severance Pay              | 150 | 33,15333 | 5,480578 | 20 | 51  |
| Online Loans               | 150 | 75,14667 | 12,28596 | 41 | 100 |
| Cleaning Services Near Me  | 150 | 27,60667 | 7,030992 | 10 | 44  |
| War                        | 150 | 26,8     | 10,89917 | 15 | 100 |
| Layoff Law                 | 150 | 8,14     | 5,647391 | 0  | 23  |
| New Jobs                   | 150 | 84,97333 | 6,998511 | 54 | 100 |
| How To Trade In A Car      | 150 | 63,69333 | 11,39171 | 36 | 93  |
| Luxury Yachts For Sale     | 150 | 36,58667 | 20,21767 | 0  | 100 |
| Lamborghini                | 150 | 60,98    | 6,642824 | 49 | 100 |
| Lisinopril                 | 150 | 70,92    | 7,123569 | 57 | 100 |
| Apply For A Job            | 150 | 71,04    | 9,933254 | 36 | 100 |
| Tesla Cars                 | 150 | 29,76    | 6,198809 | 20 | 58  |
| Severance Package          | 150 | 47,96    | 10,02807 | 14 | 75  |
| Xhamster                   | 150 | 78,55333 | 7,867644 | 66 | 100 |
| Escort                     | 150 | 59,62667 | 18,23138 | 34 | 97  |
| Chocolate chip cookies     | 150 | 26,63333 | 8,261999 | 16 | 63  |
| Sertraline                 | 150 | 69,42667 | 8,469722 | 51 | 88  |
| Hair Salon                 | 150 | 76,13333 | 6,594351 | 60 | 91  |
| Santander                  | 150 | 75,46667 | 3,193254 | 69 | 85  |
| Social media addiction     | 150 | 47,98667 | 19,45499 | 11 | 100 |
| Counter Strike             | 150 | 60       | 14,56667 | 36 | 98  |
| Psychosomatic              | 150 | 44,84    | 7,204659 | 29 | 62  |
| Xanax                      | 150 | 63,27333 | 7,952794 | 51 | 100 |
| Walmart Nail Salon         | 150 | 62,64667 | 13,62101 | 36 | 100 |
| Glassdoor                  | 150 | 76,11333 | 10,61058 | 35 | 100 |
| Abuse                      | 150 | 66,06    | 11,49393 | 41 | 100 |
| Benzodiazepines            | 150 | 55,68667 | 8,408319 | 39 | 100 |
| Abuse Hotline              | 150 | 62,91333 | 8,966707 | 40 | 100 |
| Virus                      | 150 | 2,16     | 1,882737 | 1  | 23  |
| Beauty Salon               | 150 | 78,24    | 7,833571 | 63 | 95  |
| Work Interview             | 150 | 72,07333 | 11,62622 | 24 | 93  |
| Duration Of Benefits       | 150 | 27,47333 | 16,46583 | 0  | 71  |
| Rolex Watch                | 150 | 53,03333 | 10,21278 | 40 | 100 |
| Anxiety                    | 150 | 84,55333 | 6,400017 | 66 | 96  |
| Used Cars For Sale         | 150 | 52,47333 | 6,783019 | 36 | 73  |
| Used Cars For Sale Near Me | 150 | 45,00667 | 11,08993 | 25 | 80  |
| Epidemic                   | 150 | 5,993333 | 1,929971 | 3  | 16  |
| Slot Machine               | 150 | 18,03333 | 1,392293 | 15 | 22  |
| Louis Vuitton Bags         | 150 | 53,35333 | 7,775488 | 41 | 88  |
| To Apply For Benefit       | 150 | 18,78    | 6,552698 | 4  | 34  |
| Shelter                    | 150 | 16,36667 | 1,348211 | 14 | 24  |

|                             |     |          |          |    |     |
|-----------------------------|-----|----------|----------|----|-----|
| Refinance                   | 150 | 14,44667 | 4,025984 | 7  | 29  |
| Excessive Anger             | 150 | 30,23333 | 23,01777 | 0  | 100 |
| Gucci                       | 150 | 37,04    | 8,676807 | 24 | 75  |
| Mood Changes                | 150 | 57,72667 | 12,37767 | 30 | 100 |
| Cornbread                   | 150 | 11,97333 | 11,83893 | 6  | 91  |
| Online casino               | 150 | 7,8      | 2,687281 | 5  | 17  |
| Mercedes Cars               | 150 | 80,00667 | 7,316889 | 57 | 97  |
| How To Become A Sugar Baby  | 150 | 23,65333 | 13,87092 | 0  | 100 |
| Opioids                     | 150 | 42,92667 | 10,01884 | 24 | 100 |
| Domestic violence           | 150 | 53,35333 | 9,136648 | 37 | 100 |
| Gold Rolex                  | 150 | 67,68667 | 8,660747 | 51 | 100 |
| Curriculum Vitae            | 150 | 55,66667 | 8,446171 | 29 | 80  |
| Social Assistance           | 150 | 52,75333 | 8,8613   | 30 | 75  |
| Make Cv                     | 150 | 50,23333 | 13,84498 | 14 | 100 |
| Ramipril                    | 150 | 67,68    | 10,15803 | 41 | 100 |
| Normal heart rate           | 150 | 62,26    | 8,820682 | 44 | 100 |
| Sugar Daddy Websites        | 150 | 31,13333 | 24,71086 | 4  | 100 |
| Kickasstorrents             | 150 | 27,14667 | 16,98732 | 6  | 100 |
| Chanel                      | 150 | 50,45333 | 9,390547 | 36 | 87  |
| Depression                  | 150 | 72,22667 | 10,63182 | 46 | 98  |
| Longines Heritage           | 150 | 29,14    | 12,94855 | 4  | 100 |
| BetUS                       | 150 | 36,98667 | 13,5696  | 16 | 72  |
| Santander Consumer          | 150 | 65,24667 | 12,00835 | 44 | 100 |
| Heat Rush                   | 150 | 38,38667 | 14,25171 | 6  | 80  |
| Loans Online Same Day       | 150 | 37,86667 | 9,929731 | 10 | 62  |
| Art For Sale                | 150 | 55,88    | 5,064576 | 44 | 68  |
| Versace Bags                | 150 | 34,03333 | 11,44723 | 8  | 73  |
| Dentist                     | 150 | 79,1     | 7,102084 | 55 | 100 |
| Used Yachts For Sale        | 150 | 36,02    | 15,02413 | 3  | 75  |
| Beta blockers               | 150 | 75,19333 | 9,386336 | 52 | 100 |
| Recipes                     | 150 | 63,68    | 9,144126 | 52 | 97  |
| Housekeeper jobs            | 150 | 49,65333 | 12,64645 | 23 | 100 |
| Motivational Letter         | 150 | 39,8     | 17,08094 | 7  | 100 |
| Temporary Job               | 150 | 58,66    | 11,08347 | 25 | 90  |
| Claim Benefits              | 150 | 9,44     | 1,735844 | 6  | 17  |
| Protest                     | 150 | 1,233333 | 0,772138 | 1  | 7   |
| Minecraft                   | 150 | 41,54    | 15,92669 | 24 | 99  |
| Yachts                      | 150 | 59,36667 | 11,15324 | 40 | 100 |
| Cheap Flights               | 150 | 60,36    | 7,136521 | 48 | 76  |
| Same Day Payday Loans       | 150 | 47,66    | 13,05632 | 19 | 83  |
| Indeed                      | 150 | 81,90667 | 9,357441 | 53 | 100 |
| Zillow Homes For Rent       | 150 | 65,88    | 11,75358 | 40 | 100 |
| Pandemic                    | 150 | 1,04     | 0,364167 | 1  | 5   |
| Cheap House For Rent        | 150 | 69,92    | 11,75221 | 44 | 100 |
| Blood Pressure              | 150 | 74,46    | 8,054037 | 57 | 93  |
| Xvideos                     | 150 | 87,38667 | 4,685816 | 79 | 100 |
| Assistance                  | 150 | 44,24    | 8,399968 | 29 | 82  |
| BMW Cars                    | 150 | 78,28    | 7,441152 | 58 | 100 |
| How to stop panic attack    | 150 | 47,84    | 12,36258 | 16 | 79  |
| Ice cream                   | 150 | 47,93333 | 16,25413 | 27 | 100 |
| Cover Letter                | 150 | 76,22    | 12,14447 | 35 | 100 |
| Antidepressants             | 150 | 62,68    | 6,622435 | 45 | 94  |
| Nail Salon                  | 150 | 57,17333 | 14,48941 | 31 | 100 |
| Linkedin                    | 150 | 84,97333 | 9,716068 | 43 | 100 |
| Suicidal                    | 150 | 61,90667 | 8,904675 | 47 | 100 |
| Heart Palpitations          | 150 | 50,88    | 13,34565 | 15 | 78  |
| Luxury Bed                  | 150 | 57,49333 | 10,37922 | 36 | 89  |
| Xbox                        | 150 | 34,82667 | 8,782798 | 23 | 79  |
| Work Offer                  | 150 | 63,46667 | 10,34938 | 38 | 92  |
| Plastic Surgery             | 150 | 32,42667 | 1,897885 | 27 | 37  |
| Cars For Sale               | 150 | 57,68    | 7,016108 | 42 | 80  |
| Addiction                   | 150 | 79,63333 | 5,787532 | 67 | 100 |
| Wells Fargo Refinance Rates | 150 | 6,346667 | 4,875616 | 1  | 29  |
| Wedding Ring                | 150 | 24,49333 | 2,322191 | 20 | 39  |
| Luxury Sofa                 | 150 | 35,46667 | 11,85803 | 8  | 70  |
| Can anxiety be cured        | 150 | 41,25333 | 19,56616 | 0  | 100 |
| Pawnshop                    | 150 | 73,00667 | 8,128578 | 55 | 100 |

|                             |     |          |          |    |     |
|-----------------------------|-----|----------|----------|----|-----|
| Novogratz Sofa              | 150 | 30,76    | 15,82992 | 0  | 83  |
| How to reduce heart rate    | 150 | 34,96    | 16,88607 | 0  | 87  |
| Online Payday Loan Lenders  | 150 | 40,11333 | 19,48138 | 0  | 100 |
| Home Refinance Rates        | 150 | 7,753333 | 2,811617 | 4  | 20  |
| Cv Examples                 | 150 | 50,26667 | 14,02044 | 16 | 88  |
| piratebay                   | 150 | 43,60667 | 22,64162 | 18 | 100 |
| Cv                          | 150 | 87,81333 | 5,740924 | 62 | 96  |
| Cheap Apartments            | 150 | 73,09333 | 8,622078 | 52 | 100 |
| Loans                       | 150 | 9,833333 | 10,30502 | 6  | 100 |
| Obsessive Compulsion        | 150 | 21,85333 | 22,29075 | 0  | 100 |
| Zillow Rent                 | 150 | 54,66    | 10,22422 | 33 | 100 |
| Housekeeper                 | 150 | 50,73333 | 8,033208 | 35 | 100 |
| Employment Office           | 150 | 52,16    | 7,595548 | 24 | 70  |
| How To Rent A Private Jet   | 150 | 28,40667 | 13,22449 | 4  | 70  |
| Leauge of Legends           | 150 | 40,66667 | 12,32102 | 17 | 79  |
| Torrentz                    | 150 | 37,16    | 16,41046 | 14 | 100 |
| Unemployment                | 150 | 4,133333 | 0,609397 | 3  | 6   |
| Jobs                        | 150 | 79,74    | 6,945067 | 56 | 100 |
| Spa Services                | 150 | 68,78    | 9,986481 | 42 | 100 |
| Brain Fog                   | 150 | 28,9     | 3,878611 | 18 | 37  |
| Pizza                       | 150 | 81,73333 | 5,636252 | 70 | 99  |
| Monster                     | 150 | 38,10667 | 9,138859 | 30 | 100 |
| Spa                         | 150 | 77,15333 | 7,353707 | 61 | 98  |
| Neglect Hotline             | 150 | 40,69333 | 17,72798 | 6  | 100 |
| Online poker                | 150 | 5,24     | 0,974025 | 3  | 8   |
| Psychological Abuse         | 150 | 49,60667 | 13,83988 | 18 | 100 |
| Buy Paintings               | 150 | 55,92    | 13,43267 | 22 | 95  |
| Perindopril                 | 150 | 37,70667 | 17,82636 | 0  | 100 |
| BetOnline Sports            | 150 | 34,57333 | 19,11124 | 0  | 90  |
| Enalapril                   | 150 | 78,14    | 9,079093 | 56 | 100 |
| How To Make Money           | 150 | 76,78667 | 5,205298 | 63 | 91  |
| How To Make Money From Home | 150 | 55,19333 | 9,095833 | 34 | 75  |
| Cannot sleep                | 150 | 54,66667 | 12,38838 | 24 | 83  |
| Gig Economy                 | 150 | 16,82667 | 8,725298 | 6  | 91  |
| Violence Hotline            | 150 | 37,07333 | 10,42332 | 17 | 100 |
| uTorrent                    | 150 | 57,98    | 16,25447 | 35 | 100 |
| Payday Loans Online         | 150 | 66,72    | 13,41797 | 32 | 100 |
| Alcohol addiction           | 150 | 69,18    | 10,09024 | 46 | 100 |
| Housekeeper Near Me         | 150 | 19,38    | 8,037387 | 2  | 39  |
| Distress                    | 150 | 69,93333 | 6,377042 | 52 | 90  |
| Wedding Dress Rent          | 150 | 61,66    | 13,72835 | 28 | 100 |

Supplementary material Nr. 3.

**Table S3.** Summary statistics of keywords for the full timeframe.

|                           | count | mean     | std      | min | max |
|---------------------------|-------|----------|----------|-----|-----|
| Fortnite Battle Royale    | 260   | 22,81538 | 23,28862 | 0   | 100 |
| Withdrawal From Friends   | 260   | 21,20385 | 23,17536 | 0   | 100 |
| Hallucinations            | 260   | 79,73846 | 8,566843 | 50  | 100 |
| Wedding Dress             | 260   | 15,39231 | 7,24635  | 9   | 100 |
| Payday Loans              | 260   | 64,84231 | 16,46507 | 22  | 100 |
| Credit Score              | 260   | 67,77692 | 11,93338 | 47  | 100 |
| Social Work               | 260   | 78,00385 | 11,72645 | 39  | 100 |
| Child Protective Services | 260   | 62,56923 | 11,8331  | 36  | 100 |
| Gardening Services        | 260   | 39,78462 | 17,18646 | 4   | 97  |
| Theatre                   | 260   | 49,90769 | 25,16093 | 11  | 100 |
| Shivering                 | 260   | 51,22692 | 11,04494 | 33  | 100 |
| Cinnamon buns             | 260   | 26,09615 | 11,89994 | 10  | 100 |
| West Elm Furniture        | 260   | 59,74615 | 12,67552 | 33  | 100 |
| Job Opportunities         | 260   | 70,77308 | 14,15491 | 36  | 100 |
| Cheap Apartments for rent | 260   | 68,45769 | 8,637383 | 45  | 100 |
| Gardener                  | 260   | 63,80385 | 10,29394 | 46  | 100 |
| Chronic Pain              | 260   | 82,23077 | 8,213407 | 59  | 100 |

|                             |     |          |          |    |     |
|-----------------------------|-----|----------|----------|----|-----|
| Ziprecruiter                | 260 | 63,81538 | 13,70471 | 30 | 100 |
| Job Offer                   | 260 | 75,10769 | 12,76956 | 31 | 100 |
| Pop Yachts                  | 260 | 31,04231 | 15,13065 | 4  | 100 |
| Rolls Royce                 | 260 | 59,3     | 8,421016 | 40 | 100 |
| Sports Car For Sale         | 260 | 58,33846 | 13,33649 | 32 | 100 |
| House Cleaning Services     | 260 | 52,15769 | 16,66019 | 19 | 100 |
| OnlyFans                    | 260 | 25,31923 | 28,92451 | 1  | 100 |
| Bovada Sports               | 260 | 12,49615 | 9,918392 | 2  | 100 |
| Suicide Hotline             | 260 | 26,47308 | 6,363145 | 20 | 100 |
| Insomnia                    | 260 | 75,07308 | 9,598023 | 52 | 100 |
| How to reduce stress        | 260 | 61,03462 | 13,2887  | 30 | 100 |
| Stress                      | 260 | 78,61923 | 11,00181 | 44 | 100 |
| Employment Agency           | 260 | 61,28846 | 13,08295 | 32 | 100 |
| How Much Is Plastic Surgery | 260 | 51,41154 | 16,39038 | 13 | 100 |
| Prostitution                | 260 | 20,25769 | 7,036511 | 12 | 100 |
| Cinema                      | 260 | 35,47308 | 20,07234 | 5  | 100 |
| Apex Legends                | 260 | 5,534615 | 9,556313 | 0  | 100 |
| Cold                        | 260 | 46,38077 | 11,25062 | 32 | 100 |
| How to be happy             | 260 | 63,90769 | 7,398159 | 40 | 100 |
| Binance                     | 260 | 2,115385 | 8,136513 | 0  | 100 |
| Chanel Bags                 | 260 | 51,99615 | 9,404878 | 21 | 100 |
| Rent The Runway             | 260 | 53,66923 | 24,0599  | 11 | 100 |
| Prozac                      | 260 | 73,63462 | 5,582062 | 52 | 100 |
| Wedding Planner             | 260 | 50,62692 | 9,603493 | 32 | 100 |
| Ps4                         | 260 | 23,17308 | 8,230092 | 13 | 100 |
| Ferarri                     | 260 | 51,34615 | 9,632002 | 26 | 100 |
| Plastic Surgery Near Me     | 260 | 43,89615 | 20,46602 | 12 | 100 |
| Plastic Surgery Cost        | 260 | 59,50385 | 11,98052 | 27 | 100 |
| Define Emotional Abuse      | 260 | 33,7     | 21,91953 | 0  | 100 |
| How To Earn Money           | 260 | 71,16923 | 9,237023 | 50 | 100 |
| Yachts For Sale             | 260 | 57,28462 | 15,05472 | 32 | 100 |
| Pancakes                    | 260 | 47,55769 | 9,568718 | 38 | 100 |
| Prada Bags                  | 260 | 44,89231 | 12,19073 | 18 | 100 |
| Buspirone                   | 260 | 66,70385 | 11,16811 | 42 | 100 |
| Sleepless                   | 260 | 16,81923 | 11,06326 | 8  | 100 |
| Ballet                      | 260 | 49,06154 | 11,95374 | 31 | 100 |
| Panic Attack                | 260 | 73,09615 | 8,610086 | 55 | 100 |
| Job Vacancies               | 260 | 42,38462 | 11,69489 | 19 | 100 |
| Nail Spa                    | 260 | 63,47308 | 15,4296  | 9  | 100 |
| Tiny House For Sale         | 260 | 58,29615 | 13,11049 | 29 | 100 |
| Dior                        | 260 | 29,72308 | 16,40252 | 13 | 100 |
| Career Builder              | 260 | 26,22308 | 21,07324 | 4  | 100 |
| Best Sugar Daddy Websites   | 260 | 34,85769 | 22,33906 | 0  | 100 |
| Auto Insurance              | 260 | 70,76538 | 8,183864 | 52 | 100 |
| Job Interview               | 260 | 72,44615 | 15,091   | 28 | 100 |
| Heartstone                  | 260 | 39,16538 | 13,30717 | 12 | 100 |
| Private Jet For Sale        | 260 | 39,81538 | 11,57002 | 16 | 100 |
| Drug addiction              | 260 | 59,03462 | 10,65802 | 37 | 100 |
| Hydroxyzine                 | 260 | 63,86154 | 12,1514  | 43 | 100 |
| Celexa                      | 260 | 69,09231 | 12,10663 | 42 | 100 |
| Self Esteem                 | 260 | 67,16538 | 12,74064 | 36 | 100 |
| Fatigue                     | 260 | 80,10385 | 6,086949 | 62 | 100 |
| PornHub                     | 260 | 79,00769 | 8,205842 | 59 | 100 |
| CheapOair                   | 260 | 54,93077 | 16,70904 | 21 | 100 |
| Nervous                     | 260 | 73,50385 | 15,48882 | 35 | 100 |
| Alprazolam                  | 260 | 61,09231 | 5,523479 | 49 | 100 |
| Severance Pay               | 260 | 35,35    | 12,9542  | 17 | 100 |
| Online Loans                | 260 | 68,65769 | 14,55074 | 31 | 100 |
| Cleaning Services Near Me   | 260 | 41,57308 | 22,41066 | 10 | 100 |
| War                         | 260 | 25,24615 | 9,379236 | 15 | 100 |
| Layoff Law                  | 260 | 9,303846 | 11,29031 | 0  | 100 |
| New Jobs                    | 260 | 80,49231 | 8,58997  | 54 | 100 |
| How To Trade In A Car       | 260 | 66,34615 | 13,18927 | 26 | 100 |
| Luxury Yachts For Sale      | 260 | 35,49615 | 18,0029  | 0  | 100 |
| Lamborghini                 | 260 | 57,79615 | 7,58687  | 39 | 100 |
| Lisinopril                  | 260 | 70,28846 | 6,695058 | 57 | 100 |
| Apply For A Job             | 260 | 72,21538 | 10,31622 | 36 | 100 |

|                            |     |          |          |    |     |
|----------------------------|-----|----------|----------|----|-----|
| Tesla Cars                 | 260 | 33,86923 | 9,161687 | 19 | 100 |
| Severance Package          | 260 | 48,37692 | 14,25703 | 14 | 100 |
| Xhamster                   | 260 | 77,56923 | 7,145416 | 64 | 100 |
| Escort                     | 260 | 71,88462 | 20,47793 | 34 | 100 |
| Chocolate chip cookies     | 260 | 29,26923 | 11,8392  | 16 | 100 |
| Sertraline                 | 260 | 75,33462 | 10,73692 | 51 | 99  |
| Hair Salon                 | 260 | 75,50385 | 11,35816 | 21 | 100 |
| Santander                  | 260 | 73,08462 | 4,797095 | 60 | 100 |
| Social media addiction     | 260 | 43,77692 | 18,70963 | 11 | 100 |
| Counter Strike             | 260 | 55,01538 | 16,01012 | 26 | 100 |
| Psychosomatic              | 260 | 45,05769 | 8,485767 | 29 | 100 |
| Xanax                      | 260 | 56,04615 | 10,66612 | 38 | 100 |
| Walmart Nail Salon         | 260 | 56,88846 | 15,28844 | 13 | 100 |
| Glassdoor                  | 260 | 61,99231 | 18,98079 | 25 | 100 |
| Abuse                      | 260 | 62,03846 | 11,10386 | 39 | 100 |
| Benzodiazepines            | 260 | 53,93077 | 8,573722 | 34 | 100 |
| Abuse Hotline              | 260 | 60,98462 | 8,768128 | 39 | 100 |
| Virus                      | 260 | 4,561538 | 10,36999 | 1  | 100 |
| Beauty Salon               | 260 | 76,27308 | 10,29518 | 33 | 100 |
| Work Interview             | 260 | 70,10385 | 12,61858 | 24 | 100 |
| Duration Of Benefits       | 260 | 33,05385 | 20,71868 | 0  | 100 |
| Rolex Watch                | 260 | 50,96154 | 9,988722 | 29 | 100 |
| Anxiety                    | 260 | 87,39615 | 6,723495 | 66 | 100 |
| Used Cars For Sale         | 260 | 57,55385 | 10,75961 | 36 | 100 |
| Used Cars For Sale Near Me | 260 | 54,73846 | 16,54807 | 25 | 100 |
| Epidemic                   | 260 | 7,45     | 9,287005 | 3  | 100 |
| Slot Machine               | 260 | 19,57308 | 6,22165  | 14 | 100 |
| Louis Vuitton Bags         | 260 | 56,01538 | 10,37333 | 27 | 100 |
| To Apply For Benefit       | 260 | 27,38462 | 14,68926 | 4  | 100 |
| Shelter                    | 260 | 16,57308 | 7,901813 | 12 | 100 |
| Refinance                  | 260 | 20,51923 | 10,69567 | 7  | 100 |
| Excessive Anger            | 260 | 29,15385 | 21,67787 | 0  | 100 |
| Gucci                      | 260 | 35,83077 | 10,31035 | 20 | 100 |
| Mood Changes               | 260 | 57,49615 | 12,08768 | 30 | 100 |
| Cornbread                  | 260 | 12,54615 | 11,9362  | 6  | 100 |
| Online casino              | 260 | 14,32308 | 10,18115 | 5  | 100 |
| Mercedes Cars              | 260 | 79,65385 | 8,508648 | 48 | 100 |
| How To Become A Sugar Baby | 260 | 24,11154 | 14,1492  | 0  | 100 |
| Opioids                    | 260 | 36,68846 | 11,01206 | 15 | 100 |
| Domestic violence          | 260 | 50,91154 | 9,159877 | 34 | 100 |
| Gold Rolex                 | 260 | 66,56538 | 9,769918 | 35 | 100 |
| Curriculum Vitae           | 260 | 50,89231 | 10,37576 | 27 | 100 |
| Social Assistance          | 260 | 56,16923 | 10,70066 | 30 | 100 |
| Make Cv                    | 260 | 52,62308 | 14,00952 | 14 | 100 |
| Ramipril                   | 260 | 65,12308 | 10,16924 | 41 | 100 |
| Normal heart rate          | 260 | 68,52692 | 11,3077  | 44 | 100 |
| Sugar Daddy Websites       | 260 | 23,08077 | 22,20102 | 3  | 100 |
| Kickasstorrents            | 260 | 18,96538 | 16,28376 | 0  | 100 |
| Chanel                     | 260 | 54,41923 | 10,81242 | 36 | 100 |
| Depresion                  | 260 | 72,23846 | 10,27934 | 37 | 100 |
| Longines Heritage          | 260 | 27,88077 | 12,24261 | 4  | 100 |
| BetUS                      | 260 | 41       | 20,04358 | 4  | 100 |
| Santander Consumer         | 260 | 66,12308 | 11,13589 | 44 | 100 |
| Heat Rush                  | 260 | 38,89231 | 14,78925 | 5  | 100 |
| Loans Online Same Day      | 260 | 43,16923 | 17,08084 | 7  | 100 |
| Art For Sale               | 260 | 58,18846 | 8,031734 | 36 | 100 |
| Versace Bags               | 260 | 35,41538 | 13,01308 | 8  | 100 |
| Dentist                    | 260 | 79,94231 | 9,262398 | 42 | 100 |
| Used Yachts For Sale       | 260 | 39,01538 | 16,61092 | 3  | 100 |
| Beta blockers              | 260 | 74,01923 | 9,436826 | 48 | 100 |
| Recipes                    | 260 | 64,35769 | 10,03887 | 50 | 100 |
| Housekeeper jobs           | 260 | 45,85385 | 13,16695 | 18 | 100 |
| Motivational Letter        | 260 | 36,11538 | 16,83609 | 0  | 100 |
| Temporary Job              | 260 | 56,05    | 12,01999 | 25 | 100 |
| Claim Benefits             | 260 | 19,23077 | 17,85767 | 6  | 100 |
| Protest                    | 260 | 2,007692 | 6,517569 | 1  | 100 |
| Minecraft                  | 260 | 51,60769 | 19,66692 | 24 | 100 |

|                             |     |          |          |    |     |
|-----------------------------|-----|----------|----------|----|-----|
| Yachts                      | 260 | 60,80385 | 11,9026  | 40 | 100 |
| Cheap Flights               | 260 | 49,75385 | 16,07538 | 15 | 100 |
| Same Day Payday Loans       | 260 | 47,41154 | 15,1875  | 14 | 100 |
| Indeed                      | 260 | 77,33077 | 10,94097 | 45 | 100 |
| Zillow Homes For Rent       | 260 | 67,58462 | 11,81929 | 40 | 100 |
| Pandemic                    | 260 | 7,161538 | 12,1727  | 1  | 100 |
| Cheap House For Rent        | 260 | 68,75    | 11,29505 | 41 | 100 |
| Blood Pressure              | 260 | 78,42308 | 9,17388  | 57 | 100 |
| Xvideos                     | 260 | 85,51538 | 5,58367  | 68 | 100 |
| Assistance                  | 260 | 55,18462 | 15,74276 | 29 | 100 |
| BMW Cars                    | 260 | 76,84615 | 8,606329 | 47 | 100 |
| How to stop panic attack    | 260 | 52,44231 | 13,67947 | 16 | 100 |
| Ice cream                   | 260 | 49,16923 | 15,94641 | 27 | 100 |
| Cover Letter                | 260 | 65,69231 | 16,27056 | 29 | 100 |
| Antidepressants             | 260 | 63,16923 | 6,977225 | 44 | 100 |
| Nail Salon                  | 260 | 58,29615 | 16,8271  | 11 | 100 |
| Linkedin                    | 260 | 79,49615 | 11,92042 | 42 | 100 |
| Suicidal                    | 260 | 60,6     | 8,439748 | 45 | 100 |
| Heart Palpitations          | 260 | 52,44231 | 14,13915 | 15 | 100 |
| Luxury Bed                  | 260 | 64,10769 | 13,74239 | 35 | 100 |
| Xbox                        | 260 | 36,32308 | 10,48567 | 23 | 100 |
| Work Offer                  | 260 | 68,90769 | 12,76968 | 38 | 100 |
| Plastic Surgery             | 260 | 34,17692 | 6,676722 | 25 | 100 |
| Cars For Sale               | 260 | 63,34615 | 10,97432 | 42 | 100 |
| Addiction                   | 260 | 76,13462 | 7,13745  | 57 | 100 |
| Wells Fargo Refinance Rates | 260 | 12,46154 | 13,66429 | 1  | 100 |
| Wedding Ring                | 260 | 24,03077 | 5,481367 | 15 | 100 |
| Luxury Sofa                 | 260 | 44,55    | 18,39216 | 8  | 100 |
| Can anxiety be cured        | 260 | 42,16538 | 19,36082 | 0  | 100 |
| Pawnshop                    | 260 | 68,87692 | 9,427648 | 45 | 100 |
| Novogratz Sofa              | 260 | 33,55    | 16,29937 | 0  | 100 |
| How to reduce heart rate    | 260 | 40,29615 | 18,53747 | 0  | 100 |
| Online Payday Loan Lenders  | 260 | 31,29231 | 19,90613 | 0  | 100 |
| Home Refinance Rates        | 260 | 11,21538 | 8,77077  | 4  | 100 |
| Cv Examples                 | 260 | 48,28077 | 14,60583 | 16 | 100 |
| piratebay                   | 260 | 31,76154 | 22,27844 | 9  | 100 |
| Cv                          | 260 | 87,84231 | 5,754479 | 62 | 100 |
| Cheap Apartments            | 260 | 68,53462 | 9,213614 | 46 | 100 |
| Loans                       | 260 | 9,2      | 7,88469  | 6  | 100 |
| Obsessive Compulsion        | 260 | 20,27692 | 21,01407 | 0  | 100 |
| Zillow Rent                 | 260 | 54,35    | 9,953395 | 33 | 100 |
| Housekeeper                 | 260 | 50,71923 | 8,083661 | 34 | 100 |
| Employment Office           | 260 | 48,40769 | 11,38325 | 19 | 100 |
| How To Rent A Private Jet   | 260 | 39,41923 | 20,35831 | 4  | 100 |
| Leauge of Legends           | 260 | 41,43462 | 13,50417 | 14 | 100 |
| Torrentz                    | 260 | 29,18077 | 16,73995 | 3  | 100 |
| Unemployment                | 260 | 15,12692 | 18,93403 | 3  | 100 |
| Jobs                        | 260 | 75,29615 | 8,54563  | 48 | 100 |
| Spa Services                | 260 | 63,46538 | 12,98212 | 25 | 100 |
| Brain Fog                   | 260 | 38,43077 | 16,15821 | 17 | 100 |
| Pizza                       | 260 | 81,78462 | 5,600585 | 65 | 100 |
| Monster                     | 260 | 36,44615 | 7,610257 | 28 | 100 |
| Spa                         | 260 | 75,58462 | 11,23033 | 30 | 100 |
| Neglect Hotline             | 260 | 39,14231 | 16,65407 | 6  | 100 |
| Online poker                | 260 | 6,753846 | 6,607661 | 3  | 100 |
| Psychological Abuse         | 260 | 48,48077 | 13,60628 | 14 | 100 |
| Buy Paintings               | 260 | 58,76154 | 15,20633 | 22 | 100 |
| Perindopril                 | 260 | 40,28077 | 17,88212 | 0  | 100 |
| BetOnline Sports            | 260 | 37,16923 | 20,58512 | 0  | 100 |
| Enalapril                   | 260 | 76,44231 | 9,117029 | 51 | 100 |
| How To Make Money           | 260 | 79,34231 | 6,413227 | 63 | 100 |
| How To Make Money From Home | 260 | 62,67308 | 14,02964 | 34 | 100 |
| Cannot sleep                | 260 | 56,73846 | 13,39916 | 24 | 100 |
| Gig Economy                 | 260 | 17,05385 | 10,7641  | 6  | 100 |
| Violence Hotline            | 260 | 36,91154 | 10,27404 | 17 | 100 |
| uTorrent                    | 260 | 48,72308 | 17,36637 | 23 | 100 |
| Payday Loans Online         | 260 | 56,06538 | 17,89112 | 14 | 100 |

|                     |     |          |          |    |     |
|---------------------|-----|----------|----------|----|-----|
| Alcohol addiction   | 260 | 68,87308 | 9,978125 | 46 | 100 |
| Housekeeper Near Me | 260 | 24,73846 | 12,45257 | 0  | 100 |
| Distress            | 260 | 71,79231 | 7,728198 | 52 | 100 |
| Wedding Dress Rent  | 260 | 55,55769 | 15,84555 | 17 | 100 |

Supplementary material Nr. 4.

**Table S4.** Summary statistics of keywords for the pandemic timeframe.

|                             | count | mean    | std      | min | max |
|-----------------------------|-------|---------|----------|-----|-----|
| Fortnite Battle Royale      | 80    | 10,1375 | 4,687024 | 4   | 22  |
| Withdrawal From Friends     | 80    | 28,4125 | 25,34356 | 0   | 100 |
| Hallucinations              | 80    | 82,85   | 7,520605 | 67  | 100 |
| Wedding Dress               | 80    | 13,975  | 3,939334 | 9   | 34  |
| Payday Loans                | 80    | 50,0125 | 12,99999 | 22  | 75  |
| Credit Score                | 80    | 79,4125 | 11,67351 | 50  | 100 |
| Social Work                 | 80    | 74,8125 | 11,20363 | 39  | 99  |
| Child Protective Services   | 80    | 52,2375 | 6,812579 | 36  | 80  |
| Gardening Services          | 80    | 49,625  | 16,84507 | 20  | 97  |
| Theatre                     | 80    | 19,1875 | 11,17195 | 11  | 62  |
| Shivering                   | 80    | 52,8    | 6,969009 | 40  | 71  |
| Cinnamon buns               | 80    | 31,4    | 14,65347 | 14  | 100 |
| West Elm Furniture          | 80    | 67,4625 | 13,18317 | 35  | 91  |
| Job Opportunities           | 80    | 58,8625 | 8,319177 | 36  | 87  |
| Cheap Apartments for rent   | 80    | 63,025  | 6,162309 | 45  | 76  |
| Gardener                    | 80    | 69,125  | 11,21298 | 52  | 100 |
| Chronic Pain                | 80    | 75,8    | 6,836981 | 59  | 90  |
| Ziprecruiter                | 80    | 53,775  | 10,15696 | 30  | 85  |
| Job Offer                   | 80    | 69,3625 | 13,06773 | 35  | 94  |
| Pop Yachts                  | 80    | 40,2    | 18,40363 | 4   | 100 |
| Rolls Royce                 | 80    | 61,925  | 9,299211 | 40  | 97  |
| Sports Car For Sale         | 80    | 68,5375 | 13,67706 | 38  | 100 |
| House Cleaning Services     | 80    | 57,5875 | 21,95778 | 19  | 100 |
| OnlyFans                    | 80    | 53,4625 | 18,30815 | 11  | 79  |
| Bovada Sports               | 80    | 9,2375  | 11,74329 | 2   | 100 |
| Suicide Hotline             | 80    | 24,9    | 3,079536 | 20  | 40  |
| Insomnia                    | 80    | 82,4875 | 7,890057 | 57  | 100 |
| How to reduce stress        | 80    | 64,275  | 13,1052  | 31  | 100 |
| Stress                      | 80    | 78,5    | 9,285895 | 49  | 100 |
| Employment Agency           | 80    | 50,425  | 8,148581 | 34  | 77  |
| How Much Is Plastic Surgery | 80    | 66,3    | 13,02617 | 33  | 100 |
| Prostitution                | 80    | 16,1875 | 3,13047  | 12  | 39  |
| Cinema                      | 80    | 12,325  | 8,473003 | 5   | 42  |
| Apex Legends                | 80    | 6,8875  | 2,204677 | 4   | 17  |
| Cold                        | 80    | 49,3375 | 12,54354 | 33  | 100 |
| How to be happy             | 80    | 65,375  | 7,911496 | 40  | 83  |
| Binance                     | 80    | 1,1875  | 0,597331 | 1   | 5   |
| Chanel Bags                 | 80    | 52,475  | 10,58776 | 21  | 79  |
| Rent The Runway             | 80    | 25,5375 | 14,30849 | 11  | 73  |
| Prozac                      | 80    | 71,1625 | 6,590065 | 52  | 84  |
| Wedding Planner             | 80    | 49,25   | 8,387    | 32  | 81  |
| Ps4                         | 80    | 23,225  | 5,94697  | 16  | 39  |
| Ferarri                     | 80    | 50,2375 | 8,528795 | 30  | 71  |
| Plastic Surgery Near Me     | 80    | 61,5    | 17,12796 | 25  | 100 |
| Plastic Surgery Cost        | 80    | 68,875  | 12,96966 | 34  | 100 |
| Define Emotional Abuse      | 80    | 35,05   | 23,39745 | 0   | 93  |
| How To Earn Money           | 80    | 77,1    | 10,06259 | 57  | 100 |
| Yachts For Sale             | 80    | 68      | 15,7118  | 34  | 100 |
| Pancakes                    | 80    | 51,8    | 14,01753 | 38  | 100 |
| Prada Bags                  | 80    | 45,975  | 12,72889 | 18  | 73  |
| Buspirone                   | 80    | 74,425  | 6,525073 | 58  | 88  |
| Sleepless                   | 80    | 16,975  | 11,44162 | 8   | 100 |
| Ballet                      | 80    | 37,4875 | 4,717309 | 31  | 52  |
| Panic Attack                | 80    | 81,075  | 5,066082 | 69  | 100 |

|                            |    |         |          |    |     |
|----------------------------|----|---------|----------|----|-----|
| Job Vacancies              | 80 | 39,5625 | 9,270675 | 21 | 73  |
| Nail Spa                   | 80 | 60,975  | 21,87477 | 9  | 100 |
| Tiny House For Sale        | 80 | 67,6625 | 13,14471 | 44 | 100 |
| Dior                       | 80 | 39,8625 | 8,770987 | 23 | 62  |
| Career Builder             | 80 | 11,0125 | 3,695683 | 5  | 22  |
| Best Sugar Daddy Websites  | 80 | 28,5    | 19,7894  | 0  | 86  |
| Auto Insurance             | 80 | 65,4375 | 5,423446 | 52 | 84  |
| Job Interview              | 80 | 60,775  | 12,25052 | 34 | 81  |
| Heartstone                 | 80 | 31,875  | 7,983171 | 12 | 55  |
| Private Jet For Sale       | 80 | 41,0125 | 10,76033 | 17 | 72  |
| Drug addiction             | 80 | 52,2    | 7,206537 | 37 | 71  |
| Hydroxyzine                | 80 | 73,3    | 5,549319 | 60 | 85  |
| Celexa                     | 80 | 58,7625 | 5,932625 | 45 | 73  |
| Self Esteem                | 80 | 61,6875 | 12,21598 | 40 | 100 |
| Fatigue                    | 80 | 81,6125 | 5,742345 | 68 | 93  |
| PornHub                    | 80 | 83,8    | 5,799171 | 72 | 95  |
| CheapOair                  | 80 | 37,075  | 13,67783 | 21 | 100 |
| Nervous                    | 80 | 70,8875 | 14,60882 | 38 | 100 |
| Alprazolam                 | 80 | 58,65   | 3,646049 | 50 | 68  |
| Severance Pay              | 80 | 43,0125 | 19,60786 | 17 | 100 |
| Online Loans               | 80 | 55,4125 | 11,1295  | 31 | 82  |
| Cleaning Services Near Me  | 80 | 56,175  | 23,47677 | 15 | 98  |
| War                        | 80 | 23,7    | 4,82976  | 16 | 44  |
| Layoff Law                 | 80 | 13,3375 | 18,05122 | 0  | 100 |
| New Jobs                   | 80 | 74,1    | 6,672445 | 55 | 90  |
| How To Trade In A Car      | 80 | 70,4375 | 14,25433 | 26 | 100 |
| Luxury Yachts For Sale     | 80 | 34,85   | 15,15414 | 0  | 83  |
| Lamborghini                | 80 | 55,1375 | 6,170046 | 39 | 72  |
| Lisinopril                 | 80 | 70,075  | 5,901673 | 57 | 80  |
| Apply For A Job            | 80 | 74,8625 | 10,42483 | 40 | 97  |
| Tesla Cars                 | 80 | 38,05   | 8,215299 | 19 | 61  |
| Severance Package          | 80 | 53,3625 | 19,17557 | 18 | 100 |
| Xhamster                   | 80 | 74,6875 | 5,879795 | 64 | 86  |
| Escort                     | 80 | 86,1875 | 7,053312 | 73 | 98  |
| Chocolate chip cookies     | 80 | 34,9125 | 15,92879 | 19 | 100 |
| Sertraline                 | 80 | 81,425  | 7,394447 | 64 | 97  |
| Hair Salon                 | 80 | 73,95   | 17,86936 | 21 | 100 |
| Santander                  | 80 | 70,0625 | 5,207939 | 60 | 100 |
| Social media addiction     | 80 | 37,9125 | 17,20626 | 11 | 86  |
| Counter Strike             | 80 | 52,35   | 15,97712 | 31 | 100 |
| Psychosomatic              | 80 | 45,1    | 9,364084 | 30 | 92  |
| Xanax                      | 80 | 47,625  | 3,0205   | 41 | 55  |
| Walmart Nail Salon         | 80 | 51,225  | 15,11557 | 13 | 80  |
| Glassdoor                  | 80 | 43,2875 | 7,89519  | 25 | 70  |
| Abuse                      | 80 | 57,6625 | 7,939556 | 39 | 77  |
| Benzodiazepines            | 80 | 51,5125 | 7,604119 | 39 | 83  |
| Abuse Hotline              | 80 | 59,1625 | 7,568161 | 42 | 74  |
| Virus                      | 80 | 9,875   | 17,44821 | 2  | 100 |
| Beauty Salon               | 80 | 72,5875 | 14,17583 | 33 | 100 |
| Work Interview             | 80 | 65,2875 | 11,9272  | 34 | 91  |
| Duration Of Benefits       | 80 | 41,6375 | 23,82172 | 0  | 100 |
| Rolex Watch                | 80 | 45,8625 | 7,486264 | 29 | 67  |
| Anxiety                    | 80 | 90,725  | 4,873008 | 78 | 100 |
| Used Cars For Sale         | 80 | 64,1    | 12,54319 | 37 | 100 |
| Used Cars For Sale Near Me | 80 | 69,2875 | 13,83556 | 37 | 100 |
| Epidemic                   | 80 | 11,2    | 15,95516 | 3  | 100 |
| Slot Machine               | 80 | 20,325  | 10,05274 | 14 | 100 |
| Louis Vuitton Bags         | 80 | 56,25   | 10,66344 | 27 | 80  |
| To Apply For Benefit       | 80 | 40,2375 | 15,81398 | 10 | 100 |
| Shelter                    | 80 | 17,975  | 14,00811 | 12 | 100 |
| Refinance                  | 80 | 31,525  | 12,25052 | 22 | 100 |
| Excessive Anger            | 80 | 27,8625 | 19,43815 | 0  | 76  |
| Gucci                      | 80 | 31,3125 | 7,278534 | 20 | 83  |
| Mood Changes               | 80 | 57,675  | 12,28025 | 34 | 89  |
| Cornbread                  | 80 | 12,3875 | 10,75091 | 7  | 100 |
| Online casino              | 80 | 21,525  | 10,9336  | 10 | 100 |
| Mercedes Cars              | 80 | 79,825  | 10,81112 | 48 | 100 |

|                             |    |         |          |    |     |
|-----------------------------|----|---------|----------|----|-----|
| How To Become A Sugar Baby  | 80 | 28,5625 | 14,62341 | 0  | 77  |
| Opioids                     | 80 | 27,8125 | 5,059378 | 15 | 46  |
| Domestic violence           | 80 | 45,925  | 5,84997  | 34 | 61  |
| Gold Rolex                  | 80 | 61,5625 | 9,938856 | 35 | 84  |
| Curriculum Vitae            | 80 | 44,225  | 7,382797 | 30 | 68  |
| Social Assistance           | 80 | 59,5125 | 10,90232 | 35 | 100 |
| Make Cv                     | 80 | 55,4875 | 13,63539 | 32 | 100 |
| Ramipril                    | 80 | 62      | 8,915922 | 45 | 80  |
| Normal heart rate           | 80 | 76,25   | 7,564909 | 57 | 95  |
| Sugar Daddy Websites        | 80 | 7,9     | 2,462889 | 4  | 15  |
| Kicksasstorrents            | 80 | 8,75    | 4,320982 | 1  | 22  |
| Chanel                      | 80 | 57,8875 | 7,567408 | 42 | 88  |
| Depresion                   | 80 | 72,125  | 9,135236 | 54 | 92  |
| Longines Heritage           | 80 | 26,1625 | 10,7826  | 7  | 63  |
| BetUS                       | 80 | 34,6875 | 17,16015 | 4  | 59  |
| Santander Consumer          | 80 | 63,4875 | 8,117794 | 46 | 82  |
| Heat Rush                   | 80 | 40,9625 | 15,72263 | 9  | 100 |
| Loans Online Same Day       | 80 | 42,6    | 18,96472 | 7  | 82  |
| Art For Sale                | 80 | 61,7875 | 11,39364 | 36 | 100 |
| Versace Bags                | 80 | 34,3125 | 12,56436 | 12 | 69  |
| Dentist                     | 80 | 79,9125 | 12,51651 | 42 | 94  |
| Used Yachts For Sale        | 80 | 46,925  | 17,03071 | 12 | 100 |
| Beta blockers               | 80 | 72,1125 | 9,194101 | 48 | 91  |
| Recipes                     | 80 | 67,4625 | 11,74189 | 50 | 100 |
| Housekeeper jobs            | 80 | 38,2875 | 10,93733 | 18 | 62  |
| Motivational Letter         | 80 | 30,275  | 15,44855 | 0  | 61  |
| Temporary Job               | 80 | 54,625  | 12,87267 | 31 | 100 |
| Claim Benefits              | 80 | 39,6375 | 20,46624 | 9  | 100 |
| Protest                     | 80 | 3,775   | 11,55501 | 1  | 100 |
| Minecraft                   | 80 | 71,2375 | 13,7263  | 44 | 100 |
| Yachts                      | 80 | 64,9625 | 12,65856 | 41 | 93  |
| Cheap Flights               | 80 | 35,6125 | 15,19785 | 15 | 100 |
| Same Day Payday Loans       | 80 | 40,925  | 14,89862 | 14 | 74  |
| Indeed                      | 80 | 68,5375 | 9,25578  | 45 | 90  |
| Zillow Homes For Rent       | 80 | 73,35   | 10,50027 | 42 | 95  |
| Pandemic                    | 80 | 19,225  | 16,30328 | 3  | 100 |
| Cheap House For Rent        | 80 | 67,7625 | 11,0181  | 41 | 92  |
| Blood Pressure              | 80 | 82,0375 | 7,78906  | 66 | 100 |
| Xvideos                     | 80 | 81,65   | 5,957869 | 68 | 93  |
| Assistance                  | 80 | 68,0875 | 9,620908 | 42 | 93  |
| BMW Cars                    | 80 | 75,15   | 10,66296 | 47 | 95  |
| How to stop panic attack    | 80 | 59,2875 | 12,47802 | 27 | 94  |
| Ice cream                   | 80 | 53,9    | 16,37658 | 27 | 88  |
| Cover Letter                | 80 | 51,6875 | 8,432297 | 29 | 76  |
| Antidepressants             | 80 | 62,275  | 6,451327 | 44 | 77  |
| Nail Salon                  | 80 | 60,275  | 21,97811 | 11 | 95  |
| LinkedIn                    | 80 | 72,25   | 10,85987 | 42 | 98  |
| Suicidal                    | 80 | 58,425  | 7,947255 | 45 | 84  |
| Heart Palpitations          | 80 | 52,0375 | 13,41966 | 32 | 86  |
| Luxury Bed                  | 80 | 71,9375 | 13,4516  | 35 | 99  |
| Xbox                        | 80 | 40,25   | 12,90913 | 25 | 100 |
| Work Offer                  | 80 | 74,2625 | 10,70283 | 45 | 100 |
| Plastic Surgery             | 80 | 36,775  | 11,14118 | 25 | 100 |
| Cars For Sale               | 80 | 72,1125 | 11,55723 | 44 | 100 |
| Addiction                   | 80 | 70,15   | 5,874424 | 57 | 91  |
| Wells Fargo Refinance Rates | 80 | 26,275  | 16,92947 | 9  | 100 |
| Wedding Ring                | 80 | 23,425  | 9,320965 | 15 | 100 |
| Luxury Sofa                 | 80 | 52,9625 | 17,73036 | 12 | 100 |
| Can anxiety be cured        | 80 | 42,875  | 18,80168 | 8  | 98  |
| Pawnshop                    | 80 | 62,45   | 7,971309 | 45 | 88  |
| Novogratz Sofa              | 80 | 38,1875 | 17,31911 | 6  | 100 |
| How to reduce heart rate    | 80 | 47,4625 | 17,96547 | 11 | 100 |
| Online Payday Loan Lenders  | 80 | 16,65   | 11,73235 | 0  | 55  |
| Home Refinance Rates        | 80 | 18,7    | 12,42639 | 8  | 100 |
| Cv Examples                 | 80 | 43,3375 | 14,12596 | 23 | 89  |
| piratebay                   | 80 | 17,15   | 4,581471 | 11 | 33  |
| Cv                          | 80 | 86,8    | 5,159237 | 69 | 96  |

|                             |    |         |          |    |     |
|-----------------------------|----|---------|----------|----|-----|
| Cheap Apartments            | 80 | 62,6125 | 6,061904 | 46 | 75  |
| Loans                       | 80 | 8,4375  | 1,271337 | 7  | 15  |
| Obsessive Compulsion        | 80 | 18,8875 | 19,14898 | 0  | 75  |
| Zillow Rent                 | 80 | 56,2    | 9,699798 | 35 | 96  |
| Housekeeper                 | 80 | 47,775  | 6,521581 | 34 | 68  |
| Employment Office           | 80 | 47,0375 | 13,74768 | 23 | 100 |
| How To Rent A Private Jet   | 80 | 54,5    | 19,69772 | 15 | 100 |
| Leauge of Legends           | 80 | 41,3375 | 11,66184 | 14 | 77  |
| Torrentz                    | 80 | 21,0875 | 9,432228 | 5  | 51  |
| Unemployment                | 80 | 37,8625 | 20,06555 | 4  | 100 |
| Jobs                        | 80 | 68,3625 | 6,583915 | 48 | 83  |
| Spa Services                | 80 | 53,0625 | 13,48824 | 25 | 84  |
| Brain Fog                   | 80 | 45,025  | 14,32354 | 17 | 71  |
| Pizza                       | 80 | 82,3625 | 5,585342 | 65 | 97  |
| Monster                     | 80 | 34,375  | 4,168523 | 28 | 49  |
| Spa                         | 80 | 70,85   | 16,37156 | 30 | 100 |
| Neglect Hotline             | 80 | 36,325  | 15,34809 | 11 | 83  |
| Online poker                | 80 | 9,225   | 11,38951 | 5  | 100 |
| Psychological Abuse         | 80 | 46,425  | 12,272   | 14 | 82  |
| Buy Paintings               | 80 | 62,1375 | 16,09996 | 22 | 100 |
| Perindopril                 | 80 | 42,025  | 17,08206 | 8  | 86  |
| BetOnline Sports            | 80 | 36,6625 | 21,29952 | 0  | 100 |
| Enalapril                   | 80 | 75,1125 | 8,200021 | 58 | 96  |
| How To Make Money           | 80 | 83,8125 | 6,002307 | 65 | 100 |
| How To Make Money From Home | 80 | 74,5125 | 13,82805 | 47 | 100 |
| Cannot sleep                | 80 | 60,1375 | 14,8884  | 26 | 100 |
| Gig Economy                 | 80 | 19,6625 | 14,57581 | 6  | 100 |
| Violence Hotline            | 80 | 37,65   | 10,4592  | 19 | 67  |
| uTorrent                    | 80 | 38,6375 | 8,907746 | 24 | 65  |
| Payday Loans Online         | 80 | 37,4875 | 11,09338 | 14 | 60  |
| Alcohol addiction           | 80 | 66,3125 | 8,660391 | 50 | 86  |
| Housekeeper Near Me         | 80 | 28,1875 | 10,60462 | 0  | 66  |
| Distress                    | 80 | 75,3625 | 8,595324 | 55 | 100 |
| Wedding Dress Rent          | 80 | 45,4625 | 14,10085 | 17 | 77  |

## Supplementary material Nr. 5

**Table S5.** Largest correlations between IC and GTI keywords.

| Time Frame   | Keyword                | Coeffs.       | Keyword                    | Coeffs.    |
|--------------|------------------------|---------------|----------------------------|------------|
| Full         |                        | <b>P_Corr</b> |                            | <b>MIC</b> |
|              | Cheap Flights          | -0,54777      | Plastic Surgery Cost       | 0,201437   |
|              | CheapOair              | -0,50222      | Online Payday Loan Lenders | 0,206335   |
|              | Home Refinance Rates   | -0,42341      | Unemployment               | 0,218007   |
|              | Spa                    | -0,31809      | Virus                      | 0,244904   |
|              | Hair Salon             | -0,30588      | Epidemic                   | 0,250465   |
|              | Zillow Rent            | -0,26915      | OnlyFans                   | 0,257528   |
|              | Theatre                | -0,2341       | Pandemic                   | 0,319387   |
|              | Nail Spa               | -0,23228      |                            |            |
|              | Pandemic               | -0,22834      |                            |            |
|              | Epidemic               | -0,22533      |                            |            |
|              | Used Cars For Sale     | -0,21418      |                            |            |
|              | Zillow Homes For Rent  | -0,20384      |                            |            |
|              | Counter Strike         | 0,20019       |                            |            |
|              | Gig Economy            | 0,220662      |                            |            |
|              | Pancakes               | 0,256574      |                            |            |
|              | Chocolate chip cookies | 0,259052      |                            |            |
|              | To Apply For Benefit   | 0,264167      |                            |            |
|              | Assistance             | 0,269261      |                            |            |
|              | Employment Office      | 0,312934      |                            |            |
|              | Minecraft              | 0,319551      |                            |            |
|              | Claim Benefits         | 0,393878      |                            |            |
|              | Severance Pay          | 0,399649      |                            |            |
|              | Layoff Law             | 0,414922      |                            |            |
|              | Shelter                | 0,630637      |                            |            |
|              | Unemployment           | 0,796507      |                            |            |
| Pre-pandemic |                        | <b>P_Corr</b> |                            | <b>MIC</b> |
|              | Epidemic               | -0,253196911  | Cv Examples                | 0,21120685 |

|                            |              |                            |             |
|----------------------------|--------------|----------------------------|-------------|
| Online Payday Loan Lenders | -0,249494489 | Nail Spa                   | 0,213923383 |
| Plastic Surgery Cost       | -0,217918782 | Wedding Dress Rent         | 0,218723852 |
| Dior                       | 0,201614361  | How to stop panic attack   | 0,219567219 |
| Novogratz Sofa             | 0,217727746  | Luxury Yachts For Sale     | 0,222051305 |
| Assistance                 | 0,222308429  | Make Cv                    | 0,22339036  |
| Wedding Dress Rent         | 0,248948755  | Dior                       | 0,230194323 |
| Heart Palpitations         | 0,259539911  | Xbox                       | 0,231590954 |
| Kickasstorrents            | 0,266661569  | Sports Car For Sale        | 0,233540147 |
|                            |              | War                        | 0,23496201  |
|                            |              | Plastic Surgery Cost       | 0,236148072 |
|                            |              | Online Payday Loan Lenders | 0,242776719 |
|                            |              | Define Emotional Abuse     | 0,243300703 |
|                            |              | Distress                   | 0,259835869 |

|          | P_Corr                      |                             | MIC         |
|----------|-----------------------------|-----------------------------|-------------|
| Pandemic | Dentist                     | Longines Heritage           | 0,3         |
|          | Spa                         | Cannot sleep                | 0,3         |
|          | Hair Salon                  | Anxiety                     | 0,303114759 |
|          | Zillow Homes For Rent       | Cars For Sale               | 0,303114759 |
|          | Used Cars For Sale          | How to stop panic attack    | 0,303114759 |
|          | CheapOair                   | Used Yachts For Sale        | 0,303114759 |
|          | Nail Spa                    | Blood Pressure              | 0,303114759 |
|          | Cinema                      | Obsessive Compulsion        | 0,303114759 |
|          | Chronic Pain                | BetOnline Sports            | 0,303114759 |
|          | Theatre                     | Define Emotional Abuse      | 0,30370995  |
|          | Cheap Flights               | Curriculum Vitae            | 0,304052578 |
|          | Job Offer                   | Layoff Law                  | 0,304052578 |
|          | Housekeeper jobs            | Chanel Bags                 | 0,304052578 |
|          | Cleaning Services Near Me   | Ballet                      | 0,306587499 |
|          | Job Interview               | Apex Legends                | 0,309840305 |
|          | Zillow Rent                 | Employment Office           | 0,310340305 |
|          | Child Protective Services   | Duration Of Benefits        | 0,310340305 |
|          | BetUS                       | Used Cars For Sale          | 0,311000853 |
|          | Used Cars For Sale Near Me  | Shivering                   | 0,311278124 |
|          | Credit Score                | Sugar Daddy Websites        | 0,311278124 |
|          | Home Refinance Rates        | Leauge of Legends           | 0,31229243  |
|          | Cover Letter                | How To Become A Sugar Baby  | 0,31229243  |
|          | House Cleaning Services     | Online casino               | 0,314524703 |
|          | Louis Vuitton Bags          | How Much Is Plastic Surgery | 0,314524703 |
|          | Ziprecruiter                | Pawnshop                    | 0,320745966 |
|          | Suicidal                    | Xanax                       | 0,321928095 |
|          | Cold                        | Housekeeper Near Me         | 0,325662754 |
|          | Abuse Hotline               | Luxury Sofa                 | 0,328703902 |
|          | Slot Machine                | Zillow Homes For Rent       | 0,330313399 |
|          | Rent The Runway             | How To Make Money           | 0,330658903 |
|          | Nail Salon                  | Ramipril                    | 0,334574283 |
|          | Cheap Apartments            | Child Protective Services   | 0,334574283 |
|          | Gucci                       | Hallucinations              | 0,334574283 |
|          | Rolex Watch                 | Opioids                     | 0,334574283 |
|          | Brain Fog                   | Sleepless                   | 0,341799829 |
|          | Indeed                      | Heartstone                  | 0,345043532 |
|          | Sertraline                  | House Cleaning Services     | 0,34555161  |
|          | Rolls Royce                 | Violence Hotline            | 0,34555161  |
|          | Prozac                      | Psychosomatic               | 0,34555161  |
|          | Social media addiction      | Auto Insurance              | 0,345852407 |
|          | Cheap Apartments for rent   | Work Offer                  | 0,350631997 |
|          | Wedding Planner             | New Jobs                    | 0,350631997 |
|          | Plastic Surgery Near Me     | Chanel                      | 0,350631997 |
|          | Wedding Ring                | Cv Examples                 | 0,351783501 |
|          | Fatigue                     | Psychological Abuse         | 0,352777156 |
|          | Wedding Dress               | To Apply For Benefit        | 0,352777156 |
|          | Antidepressants             | Distress                    | 0,353075078 |
|          | Luxury Bed                  | PornHub                     | 0,358579305 |
|          | Beauty Salon                | Gardening Services          | 0,365293898 |
|          | Ice cream                   | Apply For A Job             | 0,366171005 |
|          | Bovada Sports               | Santander Consumer          | 0,366308203 |
|          | Self Esteem                 | Combread                    | 0,367102656 |
|          | Dior                        | Excessive Anger             | 0,367970661 |
|          | Payday Loans                | Job Offer                   | 0,367970661 |
|          | Wells Fargo Refinance Rates | Drug addiction              | 0,367970661 |
|          | Lamborghini                 | Mood Changes                | 0,367970661 |
|          | Work Interview              | West Elm Furniture          | 0,368263204 |
|          | Art For Sale                | Prada Bags                  | 0,368263204 |
|          | Plastic Surgery             | Yachts                      | 0,368263204 |
|          | Pandemic                    | Fatigue                     | 0,372113228 |

|                             |              |                            |             |
|-----------------------------|--------------|----------------------------|-------------|
| How To Rent A Private Jet   | -0,307374276 | How to be happy            | 0,372113228 |
| Santander                   | -0,285529985 | Jobs                       | 0,372455856 |
| Excessive Anger             | -0,284883898 | Louis Vuitton Bags         | 0,375196207 |
| Epidemic                    | -0,281584876 | Suicidal                   | 0,375196207 |
| Tesla Cars                  | -0,27909539  | Chocolate chip cookies     | 0,375196207 |
| Protest                     | -0,272616411 | Novogratz Sofa             | 0,375196207 |
| Kickasstorrents             | -0,271962236 | Pizza                      | 0,375348677 |
| Sports Car For Sale         | -0,267712661 | Cheap Flights              | 0,377098247 |
| Refinance                   | -0,266511818 | Beta blockers              | 0,377098247 |
| Tiny House For Sale         | -0,264843815 | Plastic Surgery Near Me    | 0,384191974 |
| Gold Rolex                  | -0,253337571 | Nervous                    | 0,384534602 |
| Glassdoor                   | -0,243836076 | Stress                     | 0,38619706  |
| Neglect Hotline             | -0,239414329 | Claim Benefits             | 0,392774454 |
| Private Jet For Sale        | -0,238353129 | Luxury Yachts For Sale     | 0,392774454 |
| Cheap House For Rent        | -0,23261794  | Insomnia                   | 0,392774454 |
| Work Offer                  | -0,21861625  | Zillow Rent                | 0,394170267 |
| Drug addiction              | -0,215779892 | Wedding Ring               | 0,394170267 |
| Longines Heritage           | -0,215199414 | Nail Salon                 | 0,395815602 |
| Wedding Dress Rent          | -0,211337621 | Wedding Dress              | 0,395815602 |
| Define Emotional Abuse      | -0,208329149 | Pop Yachts                 | 0,397767727 |
| Cv                          | -0,205086021 | Rent The Runway            | 0,4         |
| Social Work                 | -0,201432899 | Dentist                    | 0,402471333 |
| Xhamster                    | 0,203871524  | Chronic Pain               | 0,4048532   |
| Can anxiety be cured        | 0,214256071  | Dior                       | 0,4048532   |
| Pop Yachts                  | 0,217450797  | Work Interview             | 0,413954888 |
| piratebay                   | 0,221846225  | Enalapril                  | 0,413954888 |
| OnlyFans                    | 0,231268155  | Gucci                      | 0,413954888 |
| How to reduce heart rate    | 0,23523746   | Refinance                  | 0,414384629 |
| Lisinopril                  | 0,246987514  | Benzodiazepines            | 0,415193505 |
| Pawnshop                    | 0,263117888  | BMW Cars                   | 0,416553314 |
| War                         | 0,275679572  | Social Work                | 0,423710628 |
| Normal heart rate           | 0,282704918  | Pandemic                   | 0,424724934 |
| Depresion                   | 0,284718274  | Tiny House For Sale        | 0,427831439 |
| Online Loans                | 0,295618718  | Perindopril                | 0,43111402  |
| Violence Hotline            | 0,297743697  | Bovada Sports              | 0,43696913  |
| Pizza                       | 0,335933503  | Gold Rolex                 | 0,43696913  |
| How To Earn Money           | 0,342944008  | Plastic Surgery            | 0,439353872 |
| Cannot sleep                | 0,352638075  | Cover Letter               | 0,441796954 |
| Employment Agency           | 0,352868047  | Best Sugar Daddy Websites  | 0,441796954 |
| Gig Economy                 | 0,369059564  | Celexa                     | 0,446057838 |
| How to stop panic attack    | 0,372267502  | Gig Economy                | 0,446057838 |
| Best Sugar Daddy Websites   | 0,386262185  | Protest                    | 0,44758468  |
| How to reduce stress        | 0,407863035  | Heat Rush                  | 0,4490225   |
| Stress                      | 0,41525714   | Online Loans               | 0,450837427 |
| Xbox                        | 0,41700595   | Pancakes                   | 0,45293788  |
| Hydroxyzine                 | 0,429995032  | Plastic Surgery Cost       | 0,45293788  |
| Claim Benefits              | 0,443740937  | Used Cars For Sale Near Me | 0,453283384 |
| Xvideos                     | 0,4695292    | Antidepressants            | 0,453283384 |
| Cinnamon buns               | 0,469580221  | Cheap Apartments           | 0,453283384 |
| Sugar Daddy Websites        | 0,484253278  | Abuse                      | 0,459817922 |
| How To Make Money From Home | 0,502666141  | Yachts For Sale            | 0,469554782 |
| Pancakes                    | 0,53456753   | Credit Score               | 0,472661286 |
| Anxiety                     | 0,568187785  | Job Opportunities          | 0,472661286 |
| Recipes                     | 0,594411483  | Luxury Bed                 | 0,478808939 |
| uTorrent                    | 0,620281439  | Home Refinance Rates       | 0,479886832 |
| Assistance                  | 0,622723748  | Job Vacancies              | 0,485688981 |
| Alprazolam                  | 0,624948771  | Brain Fog                  | 0,492774454 |
| Temporary Job               | 0,637448814  | OnlyFans                   | 0,493422606 |
| Xanax                       | 0,649353617  | Buy Paintings              | 0,493852347 |
| How To Make Money           | 0,649774169  | Abuse Hotline              | 0,506007579 |
| PornHub                     | 0,652072974  | How To Earn Money          | 0,506007579 |
| To Apply For Benefit        | 0,655614097  | Gardener                   | 0,506007579 |
| Online casino               | 0,673363923  | Assistance                 | 0,507299157 |
| Panic Attack                | 0,675560173  | Hair Salon                 | 0,509185925 |
| Shelter                     | 0,679367402  | Online poker               | 0,509185925 |
| Distress                    | 0,680836465  | Nail Spa                   | 0,513233125 |
| Ps4                         | 0,696119069  | Beauty Salon               | 0,513233125 |
| Social Assistance           | 0,706306535  | Severance Pay              | 0,513233125 |
| Layoff Law                  | 0,737998285  | Recipes                    | 0,51989711  |
| Loans                       | 0,749619513  | Fortnite Battle Royale     | 0,546790227 |
| Apply For A Job             | 0,750068217  | Ziprecruiter               | 0,548882426 |
| Chocolate chip cookies      | 0,755317481  | Cinema                     | 0,556779649 |
| Cornbread                   | 0,768973697  | Ps4                        | 0,570950594 |
| Counter Strike              | 0,780460131  | Counter Strike             | 0,579541329 |
| Employment Office           | 0,797542352  | Buspirone                  | 0,579541329 |

|                   |             |               |             |
|-------------------|-------------|---------------|-------------|
| Minecraft         | 0,798606529 | Virus         | 0,589176993 |
| Unemployment      | 0,857784186 | Indeed        | 0,590176027 |
| Online poker      | 0,866903515 | Cinnamon buns | 0,6         |
| Severance Package | 0,88139277  | Lisinopril    | 0,647944606 |
| Severance Pay     | 0,896527129 | Sertraline    | 0,648882426 |
|                   |             | Loans         | 0,6490225   |
|                   |             | Job Interview | 0,674205427 |
|                   |             | Epidemic      | 0,690682255 |
|                   |             | Rolex Watch   | 0,692774454 |
|                   |             | Spa           | 0,697907801 |
|                   |             | Minecraft     | 0,717285704 |
|                   |             | Unemployment  | 0,721928095 |
|                   |             | Theatre       | 0,72451125  |
|                   |             | Spa Services  | 0,758276657 |

## Supplementary material Nr. 6

**Table S6.** ADF fuller test results.

|    | Keyword                     | Adf. test before diff. | Adf. test after diff. |
|----|-----------------------------|------------------------|-----------------------|
| 0  | Fortnite Battle Royale      | 0,503554               | 1,34697E-09           |
| 1  | Withdrawal From Friends     | 1,76E-28               | 2,38227E-10           |
| 2  | Hallucinations              | 0,006983               | 1,87765E-16           |
| 3  | Wedding Dress               | 7,75E-10               | 3,72093E-11           |
| 4  | Payday Loans                | 0,00582                | 0,001028012           |
| 5  | Credit Score                | 0,106505               | 3,13381E-05           |
| 6  | Social Work                 | 1,23E-08               | 1,60051E-06           |
| 7  | Child Protective Services   | 0,808569               | 5,02837E-13           |
| 8  | Gardening Services          | 0,005621               | 5,14562E-19           |
| 9  | Theatre                     | 0,669981               | 8,41308E-11           |
| 10 | Shivering                   | 0,005851               | 1,88724E-19           |
| 11 | Cinnamon buns               | 0,00044                | 1,4676E-16            |
| 12 | West Elm Furniture          | 0,066782               | 1,6173E-18            |
| 13 | Job Opportunities           | 0,098166               | 4,63336E-17           |
| 14 | Cheap Apartments for rent   | 0,00363                | 4,40826E-24           |
| 15 | Gardener                    | 0,000851               | 3,31336E-29           |
| 16 | Chronic Pain                | 0,001993               | 2,03666E-12           |
| 17 | Ziprecruiter                | 0,01107                | 3,12174E-28           |
| 18 | Job Offer                   | 0,17552                | 1,57805E-18           |
| 19 | Pop Yachts                  | 0,009568               | 3,60144E-18           |
| 20 | Rolls Royce                 | 9,86E-13               | 3,52596E-09           |
| 21 | Sports Car For Sale         | 0,11177                | 1,26595E-15           |
| 22 | House Cleaning Services     | 0,330161               | 4,1589E-22            |
| 23 | OnlyFans                    | 0,959951               | 0,916859078           |
| 24 | Bovada Sports               | 5,09E-05               | 6,47936E-24           |
| 25 | Suicide Hotline             | 1,15E-07               | 1,33648E-10           |
| 26 | Insomnia                    | 0,094437               | 6,35852E-19           |
| 27 | How to reduce stress        | 0,002533               | 7,19404E-11           |
| 28 | Stress                      | 1,01E-08               | 2,28625E-13           |
| 29 | Employment Agency           | 0,447386               | 1,97336E-05           |
| 30 | How Much Is Plastic Surgery | 0,422043               | 6,16122E-09           |
| 31 | Prostitution                | 7,45E-07               | 1,92711E-10           |
| 32 | Cinema                      | 0,518008               | 1,79667E-10           |
| 33 | Apex Legends                | 2,42E-05               | 3,48088E-12           |
| 34 | Cold                        | 0,005847               | 4,6822E-20            |
| 35 | How to be happy             | 2,23E-06               | 8,49526E-08           |
| 36 | Binance                     | 2,02E-06               | 3,03045E-06           |
| 37 | Chanel Bags                 | 0,003584               | 8,42686E-19           |
| 38 | Rent The Runway             | 0,127525               | 4,14345E-19           |
| 39 | Prozac                      | 2,23E-08               | 1,06049E-20           |
| 40 | Wedding Planner             | 3,37E-11               | 1,03339E-14           |
| 41 | Ps4                         | 4,97E-10               | 1,6873E-13            |
| 42 | Ferarri                     | 0,006184               | 0,019666724           |
| 43 | Plastic Surgery Near Me     | 0,641607               | 8,72596E-10           |
| 44 | Plastic Surgery Cost        | 0,001674               | 4,86757E-08           |
| 45 | Define Emotional Abuse      | 9E-27                  | 7,53338E-15           |
| 46 | How To Earn Money           | 3,6E-05                | 1,25673E-12           |
| 47 | Yachts For Sale             | 0,002532               | 7,66244E-21           |
| 48 | Pancakes                    | 0,002286               | 6,18861E-12           |

|     |                            |          |             |
|-----|----------------------------|----------|-------------|
| 49  | Prada Bags                 | 0,115839 | 1,3322E-15  |
| 50  | Buspirone                  | 0,736005 | 3,65454E-12 |
| 51  | Sleepless                  | 0,000172 | 1,40407E-21 |
| 52  | Ballet                     | 0,008374 | 5,86479E-18 |
| 53  | Panic Attack               | 0,318728 | 3,23353E-09 |
| 54  | Job Vacancies              | 0,004975 | 5,46324E-14 |
| 55  | Nail Spa                   | 0,010178 | 3,22849E-16 |
| 56  | Tiny House For Sale        | 0,003426 | 9,13057E-12 |
| 57  | Dior                       | 0,982713 | 4,68949E-10 |
| 58  | Career Builder             | 0,070243 | 8,34902E-24 |
| 59  | Best Sugar Daddy Websites  | 1,91E-25 | 1,67995E-11 |
| 60  | Auto Insurance             | 0,211359 | 9,14794E-09 |
| 61  | Job Interview              | 0,016577 | 3,78066E-16 |
| 62  | Heartstone                 | 0,412877 | 2,03156E-08 |
| 63  | Private Jet For Sale       | 4,81E-11 | 6,57221E-11 |
| 64  | Drug addiction             | 6,61E-05 | 2,87125E-29 |
| 65  | Hydroxyzine                | 0,950862 | 1,62278E-16 |
| 66  | Celexa                     | 0,488348 | 7,09792E-10 |
| 67  | Self Esteem                | 0,000273 | 2,88106E-27 |
| 68  | Fatigue                    | 0,000455 | 4,5487E-13  |
| 69  | PornHub                    | 0,08333  | 9,2384E-19  |
| 70  | CheapOair                  | 0,13405  | 3,37056E-13 |
| 71  | Nervous                    | 6,71E-08 | 1,08416E-12 |
| 72  | Alprazolam                 | 0,562824 | 8,23536E-07 |
| 73  | Severance Pay              | 0,026638 | 3,75408E-06 |
| 74  | Online Loans               | 0,00335  | 0,001283163 |
| 75  | Cleaning Services Near Me  | 0,728771 | 8,87302E-22 |
| 76  | War                        | 3,34E-05 | 1,12116E-10 |
| 77  | Layoff Law                 | 1,52E-06 | 0,001303448 |
| 78  | New Jobs                   | 0,001197 | 4,23804E-07 |
| 79  | How To Trade In A Car      | 3,12E-05 | 9,11757E-13 |
| 80  | Luxury Yachts For Sale     | 1,08E-05 | 2,17761E-16 |
| 81  | Lamborghini                | 0,017189 | 4,1374E-26  |
| 82  | Lisinopril                 | 0,000424 | 1,53129E-17 |
| 83  | Apply For A Job            | 4,91E-05 | 2,83878E-07 |
| 84  | Tesla Cars                 | 0,565924 | 1,56751E-11 |
| 85  | Severance Package          | 0,041308 | 6,42966E-10 |
| 86  | Xhamster                   | 0,082961 | 1,46646E-12 |
| 87  | Escort                     | 0,768088 | 7,30209E-27 |
| 88  | Chocolate chip cookies     | 2,13E-06 | 2,17905E-16 |
| 89  | Sertraline                 | 0,366246 | 1,11558E-09 |
| 90  | Hair Salon                 | 6,6E-06  | 2,6568E-26  |
| 91  | Santander                  | 0,190083 | 0,003249409 |
| 92  | Social media addiction     | 0,000296 | 2,8438E-16  |
| 93  | Counter Strike             | 0,050378 | 1,88816E-24 |
| 94  | Psychosomatic              | 9,11E-19 | 7,56448E-16 |
| 95  | Xanax                      | 0,511566 | 1,10711E-14 |
| 96  | Walmart Nail Salon         | 0,004444 | 1,73632E-13 |
| 97  | Glassdoor                  | 0,78651  | 9,94975E-07 |
| 98  | Abuse                      | 2,78E-08 | 3,31565E-13 |
| 99  | Benzodiazepines            | 1,65E-13 | 7,57958E-08 |
| 100 | Abuse Hotline              | 4,56E-07 | 7,56885E-15 |
| 101 | Virus                      | 0,013556 | 1,32536E-15 |
| 102 | Beauty Salon               | 5,9E-05  | 1,74928E-24 |
| 103 | Work Interview             | 1,82E-07 | 7,71973E-17 |
| 104 | Duration Of Benefits       | 1,98E-10 | 2,25712E-08 |
| 105 | Rolex Watch                | 0,001539 | 4,03872E-15 |
| 106 | Anxiety                    | 0,043081 | 3,74799E-15 |
| 107 | Used Cars For Sale         | 0,1167   | 5,32583E-26 |
| 108 | Used Cars For Sale Near Me | 0,195121 | 2,9083E-22  |
| 109 | Epidemic                   | 0,000902 | 8,6393E-25  |
| 110 | Slot Machine               | 8,64E-09 | 1,3607E-14  |
| 111 | Louis Vuitton Bags         | 0,005215 | 1,71676E-06 |
| 112 | To Apply For Benefit       | 0,000291 | 7,2864E-16  |
| 113 | Shelter                    | 6,31E-08 | 6,87835E-21 |
| 114 | Refinance                  | 0,553437 | 2,00165E-13 |
| 115 | Excessive Anger            | 1,84E-27 | 1,01848E-09 |

|     |                             |          |             |
|-----|-----------------------------|----------|-------------|
| 116 | Gucci                       | 0,000295 | 6,95058E-18 |
| 117 | Mood Changes                | 2,47E-14 | 3,05578E-15 |
| 118 | Cornbread                   | 5,19E-05 | 3,32573E-14 |
| 119 | Online casino               | 0,578326 | 1,42125E-14 |
| 120 | Mercedes Cars               | 0,000339 | 2,3342E-09  |
| 121 | How To Become A Sugar Baby  | 4,97E-06 | 0,000183508 |
| 122 | Opioids                     | 0,42522  | 5,10904E-08 |
| 123 | Domestic violence           | 1,42E-06 | 1,13371E-12 |
| 124 | Gold Rolex                  | 1,24E-05 | 2,26495E-14 |
| 125 | Curriculum Vitae            | 0,000137 | 4,47711E-12 |
| 126 | Social Assistance           | 3,81E-06 | 3,00125E-14 |
| 127 | Make Cv                     | 3,54E-26 | 3,08891E-14 |
| 128 | Ramipril                    | 0,008808 | 4,06691E-10 |
| 129 | Normal heart rate           | 0,006199 | 3,95043E-21 |
| 130 | Sugar Daddy Websites        | 0,197681 | 5,66669E-26 |
| 131 | Kickasstorrents             | 0,019349 | 2,39084E-10 |
| 132 | Chanel                      | 0,006142 | 1,16895E-19 |
| 133 | Depresion                   | 9,92E-05 | 1,80004E-19 |
| 134 | Longines Heritage           | 4,3E-06  | 4,5098E-08  |
| 135 | BetUS                       | 0,034356 | 4,51036E-25 |
| 136 | Santander Consumer          | 0,383371 | 0,000130553 |
| 137 | Heat Rush                   | 6,98E-05 | 1,11511E-09 |
| 138 | Loans Online Same Day       | 0,345651 | 2,29218E-12 |
| 139 | Art For Sale                | 0,002887 | 6,75269E-08 |
| 140 | Versace Bags                | 0,000146 | 1,1211E-17  |
| 141 | Dentist                     | 2,2E-05  | 8,33517E-17 |
| 142 | Used Yachts For Sale        | 0,001162 | 1,39767E-08 |
| 143 | Beta blockers               | 5,86E-07 | 2,2319E-14  |
| 144 | Recipes                     | 0,001029 | 0,000558169 |
| 145 | Housekeeper jobs            | 2,01E-05 | 1,69851E-06 |
| 146 | Motivational Letter         | 3,82E-09 | 6,31525E-12 |
| 147 | Temporary Job               | 3,89E-07 | 1,00102E-06 |
| 148 | Claim Benefits              | 0,067735 | 8,62785E-18 |
| 149 | Protest                     | 2,14E-18 | 5,45224E-21 |
| 150 | Minecraft                   | 0,147762 | 3,73029E-08 |
| 151 | Yachts                      | 4,6E-05  | 1,90691E-19 |
| 152 | Cheap Flights               | 0,069387 | 7,69562E-22 |
| 153 | Same Day Payday Loans       | 0,025748 | 7,11747E-16 |
| 154 | Indeed                      | 0,006753 | 8,13002E-20 |
| 155 | Zillow Homes For Rent       | 0,002457 | 2,68679E-29 |
| 156 | Pandemic                    | 0,015511 | 0           |
| 157 | Cheap House For Rent        | 2,68E-05 | 5,87432E-27 |
| 158 | Blood Pressure              | 0,156652 | 2,39778E-08 |
| 159 | Xvideos                     | 0,08495  | 5,59144E-15 |
| 160 | Assistance                  | 0,162042 | 5,3096E-28  |
| 161 | BMW Cars                    | 0,011755 | 3,84892E-15 |
| 162 | How to stop panic attack    | 2,93E-06 | 6,12507E-09 |
| 163 | Ice cream                   | 1,63E-05 | 7,03844E-05 |
| 164 | Cover Letter                | 0,526403 | 1,34935E-13 |
| 165 | Antidepressants             | 9,06E-08 | 4,22992E-12 |
| 166 | Nail Salon                  | 0,000882 | 6,55285E-15 |
| 167 | Linkedin                    | 0,117256 | 1,99151E-06 |
| 168 | Suicidal                    | 0,003693 | 3,33466E-07 |
| 169 | Heart Palpitations          | 1,43E-27 | 2,39204E-13 |
| 170 | Luxury Bed                  | 0,135803 | 6,79277E-18 |
| 171 | Xbox                        | 0,000207 | 9,31264E-07 |
| 172 | Work Offer                  | 0,004566 | 6,82145E-16 |
| 173 | Plastic Surgery             | 0,073101 | 1,61974E-10 |
| 174 | Cars For Sale               | 0,079986 | 1,05451E-23 |
| 175 | Addiction                   | 5,84E-06 | 5,26021E-28 |
| 176 | Wells Fargo Refinance Rates | 0,134323 | 0,183968343 |
| 177 | Wedding Ring                | 5,8E-20  | 4,84693E-12 |
| 178 | Luxury Sofa                 | 0,688213 | 4,30689E-11 |
| 179 | Can anxiety be cured        | 6,91E-27 | 7,21527E-19 |
| 180 | Pawnshop                    | 0,052524 | 4,55791E-11 |
| 181 | Novogratz Sofa              | 7,02E-05 | 3,9375E-18  |
| 182 | How to reduce heart rate    | 0,00731  | 5,58055E-10 |

|     |                             |          |             |
|-----|-----------------------------|----------|-------------|
| 183 | Online Payday Loan Lenders  | 0,02196  | 3,89651E-16 |
| 184 | Home Refinance Rates        | 0,006744 | 2,80115E-16 |
| 185 | Cv Examples                 | 9,26E-11 | 7,1283E-07  |
| 186 | piratebay                   | 0,009519 | 1,08485E-17 |
| 187 | Cv                          | 2,73E-06 | 3,53097E-20 |
| 188 | Cheap Apartments            | 0,110388 | 1,74431E-15 |
| 189 | Loans                       | 7,59E-06 | 2,29368E-05 |
| 190 | Obsessive Compulsion        | 3,78E-25 | 4,96895E-12 |
| 191 | Zillow Rent                 | 3,89E-06 | 3,3546E-10  |
| 192 | Housekeeper                 | 1,43E-07 | 3,47842E-08 |
| 193 | Employment Office           | 0,194865 | 3,34677E-17 |
| 194 | How To Rent A Private Jet   | 0,436516 | 1,21014E-13 |
| 195 | Leauge of Legends           | 0,000697 | 5,6389E-13  |
| 196 | Torrentz                    | 0,308663 | 2,33132E-22 |
| 197 | Unemployment                | 0,218861 | 7,49177E-07 |
| 198 | Jobs                        | 0,04     | 2,39594E-07 |
| 199 | Spa Services                | 0,019151 | 6,65945E-17 |
| 200 | Brain Fog                   | 0,991272 | 5,55289E-23 |
| 201 | Pizza                       | 2,66E-06 | 0,000868932 |
| 202 | Monster                     | 1,35E-06 | 1,26765E-13 |
| 203 | Spa                         | 0,002433 | 2,31299E-11 |
| 204 | Neglect Hotline             | 7,61E-27 | 5,67245E-11 |
| 205 | Online poker                | 1,84E-10 | 4,13125E-21 |
| 206 | Psychological Abuse         | 4,84E-10 | 1,98303E-08 |
| 207 | Buy Paintings               | 0,000109 | 1,98409E-19 |
| 208 | Perindopril                 | 1,35E-17 | 1,25807E-06 |
| 209 | BetOnline Sports            | 5,37E-07 | 8,07129E-06 |
| 210 | Enalapril                   | 2,02E-07 | 2,6863E-17  |
| 211 | How To Make Money           | 2,57E-05 | 2,7864E-15  |
| 212 | How To Make Money From Home | 0,201413 | 1,98649E-23 |
| 213 | Cannot sleep                | 3,9E-23  | 2,68487E-06 |
| 214 | Gig Economy                 | 3,58E-05 | 9,4364E-12  |
| 215 | Violence Hotline            | 9,85E-08 | 1,452E-08   |
| 216 | uTorrent                    | 0,171265 | 1,23215E-16 |
| 217 | Payday Loans Online         | 0,139505 | 4,05077E-30 |
| 218 | Alcohol addiction           | 1,98E-07 | 4,4408E-16  |
| 219 | Housekeeper Near Me         | 0,424281 | 1,41937E-08 |
| 220 | Distress                    | 4,97E-06 | 1,13039E-17 |
| 221 | Wedding Dress Rent          | 0,000289 | 3,8857E-16  |
| 222 | IC                          | 0,005246 | 4,32576E-15 |

## Supplementary material Nr. 7

Table S7. Correlation and MIC results aligned with keywords.

| Names                     | Corr_full | MIC_full | Corr_pre_pand. | MIC_pre_pand. | Corr_pand. | MIC_pand. |
|---------------------------|-----------|----------|----------------|---------------|------------|-----------|
| Fortnite Battle Royale    | 0,0181    | 0,1573   | 0,0033         | 0,1644        | 0,1607     | 0,5468    |
| Withdrawal From           |           |          |                |               |            |           |
| Friends                   | 0,0141    | 0,1243   | 0,0519         | 0,1500        | -0,0298    | 0,2650    |
| Hallucinations            | 0,0445    | 0,1504   | -0,1166        | 0,1785        | 0,1744     | 0,3346    |
| Wedding Dress             | -0,0180   | 0,1553   | 0,0470         | 0,1489        | -0,4124    | 0,3958    |
| Payday Loans              | -0,0651   | 0,1587   | 0,0072         | 0,1337        | -0,3602    | 0,2813    |
| Credit Score              | -0,1476   | 0,1552   | -0,1511        | 0,1698        | -0,5269    | 0,4727    |
| Social Work               | -0,0174   | 0,1415   | -0,0175        | 0,1469        | -0,2014    | 0,4237    |
| Child Protective          |           |          |                |               |            |           |
| Services                  | -0,1131   | 0,1424   | -0,0199        | 0,1389        | -0,5721    | 0,3346    |
| Gardening Services        | 0,0207    | 0,1881   | -0,0253        | 0,1486        | 0,0846     | 0,3653    |
| Theatre                   | -0,2341   | 0,1645   | -0,0605        | 0,1507        | -0,6693    | 0,7245    |
| Shivering                 | 0,0126    | 0,1656   | 0,1243         | 0,1696        | 0,1410     | 0,3113    |
| Cinnamon buns             | 0,1301    | 0,1391   | 0,0762         | 0,1145        | 0,4696     | 0,6000    |
| West Elm Furniture        | -0,0533   | 0,1511   | 0,0653         | 0,1632        | -0,1870    | 0,3683    |
| Job Opportunities         | -0,0508   | 0,1826   | -0,0181        | 0,1480        | -0,1330    | 0,4727    |
| Cheap Apartments for rent | -0,0817   | 0,1365   | 0,0910         | 0,1877        | -0,4320    | 0,2922    |

|                        |         |        |         |        |         |        |
|------------------------|---------|--------|---------|--------|---------|--------|
| Gardener               | 0,0119  | 0,1198 | -0,0359 | 0,1632 | 0,1965  | 0,5060 |
| Chronic Pain           | -0,1206 | 0,1519 | -0,1617 | 0,1679 | -0,6697 | 0,4049 |
| Ziprecruiter           | -0,1192 | 0,1442 | -0,0596 | 0,1501 | -0,5074 | 0,5489 |
| Job Offer              | -0,0799 | 0,1504 | -0,0005 | 0,1517 | -0,6425 | 0,3680 |
| Pop Yachts             | -0,0123 | 0,1683 | -0,0587 | 0,1815 | 0,2175  | 0,3978 |
| Rolls Royce            | -0,0723 | 0,1278 | 0,1192  | 0,1179 | -0,4553 | 0,2610 |
| Sports Car For Sale    | -0,0553 | 0,1590 | -0,0105 | 0,2335 | -0,2677 | 0,1875 |
| House Cleaning         |         |        |         |        |         |        |
| Services               | -0,0847 | 0,1339 | -0,0387 | 0,1440 | -0,5190 | 0,3456 |
| OnlyFans               | 0,0405  | 0,2575 | -0,0274 | 0,1023 | 0,2313  | 0,4934 |
| Bovada Sports          | -0,0160 | 0,1298 | 0,0566  | 0,1550 | -0,3798 | 0,4370 |
| Suicide Hotline        | -0,0051 | 0,1272 | -0,0207 | 0,1532 | -0,1662 | 0,2237 |
| Insomnia               | 0,0464  | 0,1550 | -0,0229 | 0,1776 | 0,1929  | 0,3928 |
| How to reduce stress   | 0,0679  | 0,1581 | 0,1467  | 0,1912 | 0,4079  | 0,2073 |
| Stress                 | 0,0556  | 0,1624 | -0,0681 | 0,1378 | 0,4153  | 0,3862 |
| Employment Agency      | 0,0205  | 0,1401 | 0,0723  | 0,1871 | 0,3529  | 0,2524 |
| How Much Is Plastic    |         |        |         |        |         |        |
| Surgery                | 0,0287  | 0,1453 | -0,0564 | 0,2048 | 0,1592  | 0,3145 |
| Prostitution           | -0,0083 | 0,1345 | 0,0159  | 0,1424 | -0,1036 | 0,1669 |
| Cinema                 | -0,1078 | 0,1710 | 0,0341  | 0,1377 | -0,6782 | 0,5568 |
| Apex Legends           | -0,0035 | 0,1611 | -0,0624 | 0,1222 | 0,0673  | 0,3098 |
| Cold                   | -0,0508 | 0,1422 | 0,0658  | 0,1476 | -0,4897 | 0,2524 |
| How to be happy        | 0,0382  | 0,1406 | 0,0203  | 0,1754 | 0,0888  | 0,3721 |
| Binance                | -0,0011 | 0,1053 | -0,0500 | 0,1051 |         | 0,0000 |
| Chanel Bags            | -0,0601 | 0,1675 | 0,0668  | 0,1568 | -0,1923 | 0,3041 |
| Rent The Runway        | -0,1605 | 0,1192 | 0,0325  | 0,1284 | -0,4837 | 0,4000 |
| Prozac                 | -0,1162 | 0,1444 | 0,0106  | 0,1352 | -0,4529 | 0,2650 |
| Wedding Planner        | -0,0881 | 0,1149 | 0,0526  | 0,1222 | -0,4295 | 0,2774 |
| Ps4                    | 0,0858  | 0,1177 | 0,0296  | 0,1358 | 0,6961  | 0,5710 |
| Ferarri                | -0,0325 | 0,1342 | -0,1521 | 0,1440 | -0,1573 | 0,1978 |
| Plastic Surgery Near   |         |        |         |        |         |        |
| Me                     | -0,0833 | 0,1663 | -0,0715 | 0,1709 | -0,4294 | 0,3842 |
| Plastic Surgery Cost   | -0,0404 | 0,2014 | -0,2179 | 0,2361 | -0,1622 | 0,4529 |
| Define Emotional       |         |        |         |        |         |        |
| Abuse                  | -0,0177 | 0,1590 | -0,0242 | 0,2433 | -0,2083 | 0,3037 |
| How To Earn Money      | 0,0807  | 0,1603 | -0,0320 | 0,1339 | 0,3429  | 0,5060 |
| Yachts For Sale        | -0,0400 | 0,1265 | -0,0733 | 0,1235 | -0,1092 | 0,4696 |
| Pancakes               | 0,2566  | 0,1959 | 0,0723  | 0,1797 | 0,5346  | 0,4529 |
| Prada Bags             | -0,0473 | 0,1284 | 0,0426  | 0,1153 | -0,1706 | 0,3683 |
| Buspirone              | -0,0246 | 0,1896 | 0,0627  | 0,1777 | -0,1195 | 0,5795 |
| Sleepless              | 0,0226  | 0,1369 | 0,1149  | 0,1212 | 0,0261  | 0,3418 |
| Ballet                 | -0,0409 | 0,1357 | 0,0164  | 0,1297 | -0,1894 | 0,3066 |
| Panic Attack           | 0,1784  | 0,1505 | 0,0152  | 0,1592 | 0,6756  | 0,2727 |
| Job Vacancies          | -0,0384 | 0,1353 | -0,0394 | 0,1783 | -0,1460 | 0,4857 |
| Nail Spa               | -0,2323 | 0,1499 | -0,0065 | 0,2139 | -0,6857 | 0,5132 |
| Tiny House For Sale    | -0,0433 | 0,1766 | -0,1156 | 0,1753 | -0,2648 | 0,4278 |
| Dior                   | -0,0877 | 0,1831 | 0,2016  | 0,2302 | -0,3632 | 0,4049 |
| Career Builder         | -0,0089 | 0,1253 | -0,0323 | 0,1537 | 0,0290  | 0,2734 |
| Best Sugar Daddy       |         |        |         |        |         |        |
| Websites               | 0,0530  | 0,1434 | -0,1334 | 0,1908 | 0,3863  | 0,4418 |
| Auto Insurance         | 0,0428  | 0,1501 | 0,0056  | 0,1303 | 0,1376  | 0,3459 |
| Job Interview          | -0,1123 | 0,1552 | -0,0243 | 0,1416 | -0,5929 | 0,6742 |
| Heartstone             | 0,0267  | 0,1740 | -0,1227 | 0,1825 | 0,1024  | 0,3450 |
| Private Jet For Sale   | -0,0420 | 0,1353 | 0,0917  | 0,1870 | -0,2384 | 0,2728 |
| Drug addiction         | -0,0581 | 0,1495 | -0,0805 | 0,1143 | -0,2158 | 0,3680 |
| Hydroxyzine            | 0,1095  | 0,1578 | 0,0015  | 0,1632 | 0,4300  | 0,2759 |
| Celexa                 | -0,0090 | 0,1447 | -0,0262 | 0,1952 | -0,0225 | 0,4461 |
| Self Esteem            | -0,0640 | 0,1230 | -0,0480 | 0,1526 | -0,3690 | 0,2341 |
| Fatigue                | -0,0533 | 0,1272 | -0,0526 | 0,1552 | -0,4170 | 0,3721 |
| PornHub                | 0,1212  | 0,1304 | 0,0514  | 0,1827 | 0,6521  | 0,3586 |
| CheapOair              | -0,5022 | 0,1572 | -0,0214 | 0,1345 | -0,6866 | 0,2650 |
| Nervous                | 0,0151  | 0,1556 | -0,1182 | 0,1581 | 0,0360  | 0,3845 |
| Alprazolam             | 0,0638  | 0,1420 | -0,0507 | 0,1198 | 0,6249  | 0,2074 |
| Severance Pay          | 0,3996  | 0,1422 | 0,0781  | 0,1508 | 0,8965  | 0,5132 |
| Online Loans           | 0,0253  | 0,1494 | 0,0675  | 0,1290 | 0,2956  | 0,4508 |
| Cleaning Services Near |         |        |         |        |         |        |
| Me                     | -0,1119 | 0,1261 | 0,0109  | 0,1276 | -0,6174 | 0,2759 |

|                        |         |        |         |        |         |        |
|------------------------|---------|--------|---------|--------|---------|--------|
| War                    | 0,0133  | 0,1510 | -0,1529 | 0,2350 | 0,2757  | 0,2795 |
| Layoff Law             | 0,4149  | 0,1507 | 0,1988  | 0,1920 | 0,7380  | 0,3041 |
| New Jobs               | -0,0151 | 0,1364 | 0,0034  | 0,1481 | 0,0485  | 0,3506 |
| How To Trade In A Car  | -0,0216 | 0,1533 | 0,0209  | 0,1711 | 0,0210  | 0,2452 |
| Luxury Yachts For Sale | -0,0382 | 0,1811 | 0,0216  | 0,2221 | -0,1407 | 0,3928 |
| Lamborghini            | -0,0794 | 0,1307 | -0,0941 | 0,1434 | -0,3470 | 0,2018 |
| Lisinopril             | 0,0094  | 0,1525 | 0,0193  | 0,2020 | 0,2470  | 0,6479 |
| Apply For A Job        | 0,1297  | 0,1572 | -0,0861 | 0,1485 | 0,7501  | 0,3662 |
| Tesla Cars             | -0,0712 | 0,1375 | -0,0965 | 0,1293 | -0,2791 | 0,2090 |
| Severance Package      | 0,1906  | 0,1415 | 0,0288  | 0,2039 | 0,8814  | 0,2650 |
| Xhamster               | 0,0099  | 0,1356 | 0,1087  | 0,1058 | 0,2039  | 0,2000 |
| Escort                 | -0,0213 | 0,1336 | 0,0513  | 0,1423 | 0,1427  | 0,2907 |
| Chocolate chip cookies | 0,2591  | 0,1488 | 0,0275  | 0,1243 | 0,7553  | 0,3752 |
| Sertraline             | -0,0737 | 0,1545 | 0,0718  | 0,2042 | -0,4575 | 0,6489 |
| Hair Salon             | -0,3059 | 0,1698 | -0,0604 | 0,2042 | -0,7624 | 0,5092 |
| Santander              | 0,0076  | 0,1206 | 0,0572  | 0,1352 | -0,2855 | 0,1449 |
| Social media addiction | -0,0909 | 0,1589 | -0,0982 | 0,1797 | -0,4358 | 0,2813 |
| Counter Strike         | 0,2002  | 0,1484 | -0,1296 | 0,1273 | 0,7805  | 0,5795 |
| Psychosomatic          | 0,0113  | 0,1813 | 0,0100  | 0,1448 | -0,0792 | 0,3456 |
| Xanax                  | 0,0772  | 0,1272 | -0,0675 | 0,1385 | 0,6494  | 0,3219 |
| Walmart Nail Salon     | -0,0450 | 0,1312 | 0,1014  | 0,1722 | 0,0831  | 0,2490 |
| Glassdoor              | -0,0576 | 0,1503 | -0,0348 | 0,1649 | -0,2438 | 0,2922 |
| Abuse                  | -0,0379 | 0,1564 | -0,0325 | 0,1214 | -0,1310 | 0,4598 |
| Benzodiazepines        | -0,0449 | 0,1537 | -0,0761 | 0,1416 | -0,1300 | 0,4152 |
| Abuse Hotline          | -0,0461 | 0,1514 | 0,0825  | 0,1721 | -0,4863 | 0,5060 |
| Virus                  | 0,0004  | 0,2449 | -0,1044 | 0,1273 | -0,0475 | 0,5892 |
| Beauty Salon           | -0,1775 | 0,1311 | -0,0126 | 0,1225 | -0,3935 | 0,5132 |
| Work Interview         | -0,0721 | 0,1627 | -0,0178 | 0,1753 | -0,3367 | 0,4140 |
| Duration Of Benefits   | -0,0216 | 0,1439 | -0,0298 | 0,1872 | -0,1813 | 0,3103 |
| Rolex Watch            | -0,0845 | 0,1889 | 0,0921  | 0,1696 | -0,4732 | 0,6928 |
| Anxiety                | 0,1132  | 0,1402 | -0,0306 | 0,1460 | 0,5682  | 0,3031 |
| Used Cars For Sale     | -0,2142 | 0,1570 | -0,0040 | 0,1260 | -0,7103 | 0,3110 |
| Used Cars For Sale     |         |        |         |        |         |        |
| Near Me                | -0,1861 | 0,1642 | 0,0509  | 0,1114 | -0,5388 | 0,4533 |
| Epidemic               | -0,2253 | 0,2505 | -0,2532 | 0,1774 | -0,2816 | 0,6907 |
| Slot Machine           | -0,0048 | 0,1658 | -0,0114 | 0,1927 | -0,4855 | 0,2865 |
| Louis Vuitton Bags     | -0,0940 | 0,1520 | -0,0430 | 0,1351 | -0,5075 | 0,3752 |
| To Apply For Benefit   | 0,2642  | 0,1705 | 0,0580  | 0,1712 | 0,6556  | 0,3528 |
| Shelter                | 0,6306  | 0,1356 | 0,1739  | 0,1414 | 0,6794  | 0,2941 |
| Refinance              | -0,1872 | 0,1525 | -0,0578 | 0,1079 | -0,2665 | 0,4144 |
| Excessive Anger        | -0,0381 | 0,1406 | 0,0365  | 0,1253 | -0,2849 | 0,3680 |
| Gucci                  | -0,0403 | 0,1531 | 0,0419  | 0,1434 | -0,4753 | 0,4140 |
| Mood Changes           | -0,0070 | 0,1175 | -0,0185 | 0,1463 | 0,0070  | 0,3680 |
| Cornbread              | 0,0101  | 0,1721 | 0,0200  | 0,1699 | 0,7690  | 0,3671 |
| Online casino          | 0,0580  | 0,1665 | 0,0076  | 0,1746 | 0,6734  | 0,3145 |
| Mercedes Cars          | -0,0110 | 0,1381 | -0,0497 | 0,1354 | -0,0621 | 0,1452 |
| How To Become A        |         |        |         |        |         |        |
| Sugar Baby             | 0,0216  | 0,1719 | -0,0136 | 0,1867 | 0,1878  | 0,3123 |
| Opioids                | -0,0293 | 0,1466 | -0,0434 | 0,1822 | -0,1356 | 0,3346 |
| Domestic violence      | -0,0114 | 0,1574 | -0,0414 | 0,1928 | -0,1341 | 0,2766 |
| Gold Rolex             | -0,0809 | 0,1210 | 0,0911  | 0,1365 | -0,2533 | 0,4370 |
| Curriculum Vitae       | 0,0059  | 0,1434 | -0,1195 | 0,1534 | 0,1985  | 0,3041 |
| Social Assistance      | 0,1917  | 0,1219 | -0,0714 | 0,1691 | 0,7063  | 0,2610 |
| Make Cv                | 0,0215  | 0,1588 | 0,0449  | 0,2234 | 0,1153  | 0,2755 |
| Ramipril               | -0,0092 | 0,1342 | 0,1077  | 0,1770 | -0,0338 | 0,3346 |
| Normal heart rate      | 0,0621  | 0,1361 | 0,0339  | 0,1103 | 0,2827  | 0,2444 |
| Sugar Daddy Websites   | 0,0331  | 0,1531 | 0,1527  | 0,1505 | 0,4843  | 0,3113 |
| Kickasstorrents        | -0,0151 | 0,1490 | 0,2667  | 0,1791 | -0,2720 | 0,2090 |
| Chanel                 | -0,0553 | 0,1424 | -0,0085 | 0,1565 | -0,1978 | 0,3506 |
| Depresion              | 0,0412  | 0,1165 | -0,1650 | 0,1409 | 0,2847  | 0,2524 |
| Longines Heritage      | -0,0399 | 0,1274 | -0,1091 | 0,1378 | -0,2152 | 0,3000 |
| BetUS                  | -0,1158 | 0,1404 | 0,1088  | 0,1342 | -0,5485 | 0,2344 |
| Santander Consumer     | 0,0592  | 0,1250 | 0,0037  | 0,1640 | 0,0501  | 0,3663 |
| Heat Rush              | -0,0405 | 0,1594 | -0,0243 | 0,1486 | 0,0501  | 0,4490 |
| Loans Online Same      |         |        |         |        |         |        |
| Day                    | -0,0208 | 0,1539 | 0,0723  | 0,1796 | 0,1077  | 0,2759 |
| Art For Sale           | -0,0725 | 0,1409 | 0,0614  | 0,1600 | -0,3353 | 0,2865 |

|                       |         |        |         |        |         |        |
|-----------------------|---------|--------|---------|--------|---------|--------|
| Versace Bags          | -0,0089 | 0,1396 | 0,0704  | 0,1305 | 0,0473  | 0,2646 |
| Dentist               | -0,1600 | 0,1714 | -0,0223 | 0,1627 | -0,8338 | 0,4025 |
| Used Yachts For Sale  | -0,0301 | 0,1421 | 0,1016  | 0,1762 | -0,1281 | 0,3031 |
| Beta blockers         | -0,0376 | 0,1232 | 0,0405  | 0,1300 | -0,1298 | 0,3771 |
| Recipes               | 0,1635  | 0,1665 | 0,0794  | 0,1478 | 0,5944  | 0,5199 |
| Housekeeper jobs      | -0,0679 | 0,1674 | -0,0203 | 0,1825 | -0,6187 | 0,2813 |
| Motivational Letter   | 0,0011  | 0,1539 | 0,0757  | 0,1731 | 0,0327  | 0,2452 |
| Temporary Job         | 0,1732  | 0,1296 | 0,1260  | 0,1312 | 0,6374  | 0,2511 |
| Claim Benefits        | 0,3939  | 0,1752 | 0,0410  | 0,1724 | 0,4437  | 0,3928 |
| Protest               | -0,0104 | 0,1384 | -0,0626 | 0,1270 | -0,2726 | 0,4476 |
| Minecraft             | 0,3196  | 0,1813 | 0,0057  | 0,1337 | 0,7986  | 0,7173 |
| Yachts                | -0,0331 | 0,1580 | -0,1154 | 0,1491 | 0,0081  | 0,3683 |
| Cheap Flights         | -0,5478 | 0,1835 | 0,0109  | 0,1054 | -0,6611 | 0,3771 |
| Same Day Payday       |         |        |         |        |         |        |
| Loans                 | -0,0029 | 0,1392 | -0,0165 | 0,1814 | 0,1861  | 0,2365 |
| Indeed                | -0,0979 | 0,1380 | -0,0380 | 0,1455 | -0,4586 | 0,5902 |
| Zillow Homes For Rent | -0,2038 | 0,1846 | 0,0539  | 0,1534 | -0,7377 | 0,3303 |
| Pandemic              | -0,2283 | 0,3194 | -0,0809 | 0,0460 | -0,3099 | 0,4247 |
| Cheap House For Rent  | -0,0283 | 0,1494 | 0,0657  | 0,1672 | -0,2326 | 0,2714 |
| Blood Pressure        | -0,0433 | 0,1361 | -0,0570 | 0,1338 | -0,1931 | 0,3031 |
| Xvideos               | 0,0629  | 0,1511 | 0,0995  | 0,1692 | 0,4695  | 0,2452 |
| Assistance            | 0,2693  | 0,1244 | 0,2223  | 0,1537 | 0,6227  | 0,5073 |
| BMW Cars              | -0,0442 | 0,1288 | 0,0165  | 0,1513 | -0,1897 | 0,4166 |
| How to stop panic     |         |        |         |        |         |        |
| attack                | 0,0766  | 0,1620 | 0,0019  | 0,2196 | 0,3723  | 0,3031 |
| Ice cream             | -0,0678 | 0,1295 | -0,0753 | 0,1226 | -0,3921 | 0,2281 |
| Cover Letter          | -0,1023 | 0,1481 | -0,0606 | 0,1666 | -0,5196 | 0,4418 |
| Antidepressants       | -0,1097 | 0,1678 | 0,1045  | 0,1828 | -0,3995 | 0,4533 |
| Nail Salon            | -0,1779 | 0,1653 | 0,0232  | 0,1310 | -0,4826 | 0,3958 |
| Linkedin              | -0,0195 | 0,1403 | -0,0250 | 0,1446 | -0,1859 | 0,2646 |
| Suicidal              | -0,0662 | 0,1449 | -0,0778 | 0,1342 | -0,4900 | 0,3752 |
| Heart Palpitations    | -0,0073 | 0,1428 | 0,2595  | 0,1874 | 0,0043  | 0,2500 |
| Luxury Bed            | -0,0563 | 0,1531 | 0,1865  | 0,1618 | -0,3962 | 0,4788 |
| Xbox                  | 0,0761  | 0,1775 | 0,1333  | 0,2316 | 0,4170  | 0,2989 |
| Work Offer            | -0,0068 | 0,1731 | -0,0041 | 0,1581 | -0,2186 | 0,3506 |
| Plastic Surgery       | 0,0050  | 0,1388 | -0,0189 | 0,1332 | -0,3269 | 0,4394 |
| Cars For Sale         | -0,0386 | 0,1483 | -0,1082 | 0,1529 | -0,0612 | 0,3031 |
| Addiction             | -0,0861 | 0,1775 | -0,0020 | 0,1420 | -0,1674 | 0,1966 |
| Wells Fargo Refinance |         |        |         |        |         |        |
| Rates                 | -0,1909 | 0,1483 | 0,0279  | 0,1716 | -0,3524 | 0,2092 |
| Wedding Ring          | -0,0409 | 0,1654 | -0,0188 | 0,1248 | -0,4182 | 0,3942 |
| Luxury Sofa           | -0,0091 | 0,1280 | 0,0455  | 0,1686 | 0,0797  | 0,3287 |
| Can anxiety be cured  | 0,0450  | 0,1332 | -0,0497 | 0,1824 | 0,2143  | 0,2524 |
| Pawnshop              | 0,0568  | 0,1758 | 0,0713  | 0,1656 | 0,2631  | 0,3207 |
| Novogratz Sofa        | 0,0035  | 0,1424 | 0,2177  | 0,1637 | 0,0943  | 0,3752 |
| How to reduce heart   |         |        |         |        |         |        |
| rate                  | 0,0253  | 0,1395 | 0,0155  | 0,1574 | 0,2352  | 0,2390 |
| Online Payday Loan    |         |        |         |        |         |        |
| Lenders               | 0,0027  | 0,2063 | -0,2495 | 0,2428 | 0,0992  | 0,2018 |
| Home Refinance Rates  | -0,4234 | 0,1415 | 0,1549  | 0,1851 | -0,5247 | 0,4799 |
| Cv Examples           | -0,0348 | 0,1540 | 0,0570  | 0,2112 | -0,0714 | 0,3518 |
| piratebay             | 0,0611  | 0,1354 | 0,3159  | 0,2039 | 0,2218  | 0,2092 |
| Cv                    | -0,0346 | 0,1897 | -0,0414 | 0,1359 | -0,2051 | 0,2713 |
| Cheap Apartments      | -0,0960 | 0,1570 | 0,0498  | 0,1701 | -0,4784 | 0,4533 |
| Loans                 | 0,0492  | 0,1718 | -0,0663 | 0,1329 | 0,7496  | 0,6490 |
| Obsessive Compulsion  | 0,0105  | 0,1589 | 0,0512  | 0,1611 | 0,0376  | 0,3031 |
| Zillow Rent           | -0,2692 | 0,1910 | -0,0496 | 0,1421 | -0,5838 | 0,3942 |
| Housekeeper           | 0,0099  | 0,1534 | 0,0377  | 0,1402 | 0,0978  | 0,1778 |
| Employment Office     | 0,3129  | 0,1350 | -0,1165 | 0,1388 | 0,7975  | 0,3103 |
| How To Rent A Private |         |        |         |        |         |        |
| Jet                   | -0,0656 | 0,1729 | -0,1078 | 0,1849 | -0,3074 | 0,2583 |
| Leauge of Legends     | 0,0423  | 0,1253 | 0,0993  | 0,1865 | 0,0794  | 0,3123 |
| Torrentz              | 0,0093  | 0,1531 | 0,1952  | 0,1748 | -0,1386 | 0,2718 |
| Unemployment          | 0,7965  | 0,2180 | -0,0074 | 0,1049 | 0,8578  | 0,7219 |
| Jobs                  | -0,0085 | 0,1553 | -0,0017 | 0,1396 | 0,1611  | 0,3725 |
| Spa Services          | -0,0523 | 0,1763 | 0,1279  | 0,2011 | -0,1701 | 0,7583 |
| Brain Fog             | -0,0822 | 0,1381 | -0,0604 | 0,1515 | -0,4650 | 0,4928 |

|                     |         |        |         |        |         |        |
|---------------------|---------|--------|---------|--------|---------|--------|
| Pizza               | 0,0528  | 0,1059 | 0,0168  | 0,1186 | 0,3359  | 0,3753 |
| Monster             | -0,0145 | 0,1220 | -0,1157 | 0,1410 | -0,0814 | 0,2646 |
| Spa                 | -0,3181 | 0,1551 | 0,0094  | 0,1307 | -0,8264 | 0,6979 |
| Neglect Hotline     | -0,0644 | 0,1451 | 0,0580  | 0,1397 | -0,2394 | 0,2524 |
| Online poker        | 0,1000  | 0,1916 | 0,0837  | 0,1012 | 0,8669  | 0,5092 |
| Psychological Abuse | 0,0175  | 0,1727 | 0,0163  | 0,2023 | 0,1045  | 0,3528 |
| Buy Paintings       | -0,0022 | 0,1420 | -0,1641 | 0,1623 | 0,0264  | 0,4939 |
| Perindopril         | 0,0302  | 0,1561 | 0,1574  | 0,2033 | 0,0086  | 0,4311 |
| BetOnline Sports    | -0,0093 | 0,1383 | -0,0584 | 0,1534 | 0,0473  | 0,3031 |
| Enalapril           | -0,0074 | 0,1641 | 0,0384  | 0,1674 | -0,1667 | 0,4140 |
| How To Make Money   | 0,1404  | 0,1329 | 0,0771  | 0,1455 | 0,6498  | 0,3307 |
| How To Make Money   |         |        |         |        |         |        |
| From Home           | 0,1351  | 0,1463 | 0,0151  | 0,1625 | 0,5027  | 0,2524 |
| Cannot sleep        | 0,0468  | 0,1162 | -0,0650 | 0,1704 | 0,3526  | 0,3000 |
| Gig Economy         | 0,2207  | 0,1180 | -0,0008 | 0,1258 | 0,3691  | 0,4461 |
| Violence Hotline    | 0,0510  | 0,1458 | -0,0159 | 0,1211 | 0,2977  | 0,3456 |
| uTorrent            | 0,1341  | 0,1410 | 0,1869  | 0,1483 | 0,6203  | 0,2656 |
| Payday Loans Online | -0,0263 | 0,1660 | 0,0458  | 0,1593 | 0,0572  | 0,2728 |
| Alcohol addiction   | -0,0148 | 0,1626 | -0,0953 | 0,1753 | -0,0476 | 0,2090 |
| Housekeeper Near Me | -0,0470 | 0,1592 | -0,1042 | 0,1563 | -0,1598 | 0,3257 |
| Distress            | 0,1272  | 0,1761 | -0,0642 | 0,2598 | 0,6808  | 0,3531 |
| Wedding Dress Rent  | -0,0462 | 0,1591 | 0,2489  | 0,2187 | -0,2113 | 0,2650 |

## Supplementary material Nr. 8

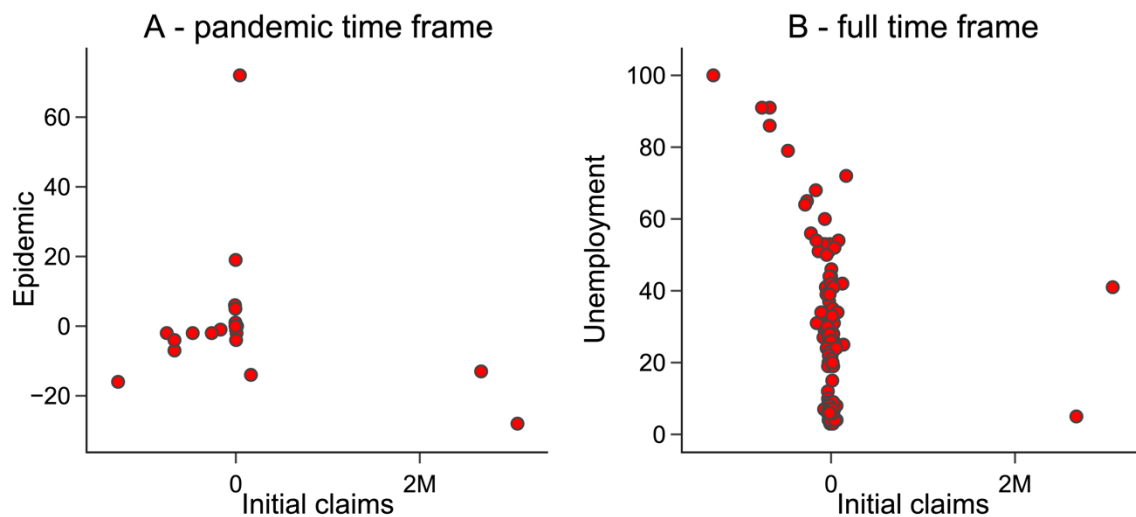

**Figure S1.** Scatter plots of Epidemic and unemployment variables for pandemic and full-time frames.
